# Supplementary material for: Design and validation of a clinical scale for prehospital stroke recognition, severity grading and prediction of large vessel occlusion: the shortened NIH Stroke Scale for emergency medical services
Source: PubMed Central journal article supplement — BMJ Open. 2017 Sep 1;7(9):e016893. doi: 10.1136/bmjopen-2017-016893 (PMC5589005; doi:10.1136/bmjopen-2017-016893), 2017-09-01
Supplement: bmjopen-2017-016893.draft_revisions.pdf [file bmjopen-2017-016893.draft_revisions.pdf]

# BMJ Open

BMJ Open is committed to open peer review. As part of this commitment we make the peer review history of every article we publish publicly available.

When an article is published we post the peer reviewers' comments and the authors' responses online. We also post the versions of the paper that were used during peer review. These are the versions that the peer review comments apply to.

The versions of the paper that follow are the versions that were submitted during the peer review process. They are not the versions of record or the final published versions. They should not be cited or distributed as the published version of this manuscript.

BMJ Open is an open access journal and the full, final, typeset and author-corrected version of record of the manuscript is available on our site with no access controls, subscription charges or pay-per-view fees (<http://bmjopen.bmj.com>).

If you have any questions on BMJ Open's open peer review process please email [editorial.bmjopen@bmj.com](mailto:editorial.bmjopen@bmj.com)

# BMJ Open

## Prehospital stroke recognition, severity grading, and prediction of large vessel occlusion using a single clinical scale only

|                                    |                                                                                                                                                                                                                                                                                                                                                                                                                                                                                                                                                                                                                                                                                                                                                                                                                                                                                                                                                                                                                                                                                                                                                                                                                                                            |
|------------------------------------|------------------------------------------------------------------------------------------------------------------------------------------------------------------------------------------------------------------------------------------------------------------------------------------------------------------------------------------------------------------------------------------------------------------------------------------------------------------------------------------------------------------------------------------------------------------------------------------------------------------------------------------------------------------------------------------------------------------------------------------------------------------------------------------------------------------------------------------------------------------------------------------------------------------------------------------------------------------------------------------------------------------------------------------------------------------------------------------------------------------------------------------------------------------------------------------------------------------------------------------------------------|
| Journal:                           | <i>BMJ Open</i>                                                                                                                                                                                                                                                                                                                                                                                                                                                                                                                                                                                                                                                                                                                                                                                                                                                                                                                                                                                                                                                                                                                                                                                                                                            |
| Manuscript ID                      | bmjopen-2017-016893                                                                                                                                                                                                                                                                                                                                                                                                                                                                                                                                                                                                                                                                                                                                                                                                                                                                                                                                                                                                                                                                                                                                                                                                                                        |
| Article Type:                      | Research                                                                                                                                                                                                                                                                                                                                                                                                                                                                                                                                                                                                                                                                                                                                                                                                                                                                                                                                                                                                                                                                                                                                                                                                                                                   |
| Date Submitted by the Author:      | 17-Mar-2017                                                                                                                                                                                                                                                                                                                                                                                                                                                                                                                                                                                                                                                                                                                                                                                                                                                                                                                                                                                                                                                                                                                                                                                                                                                |
| Complete List of Authors:          | <p>Purrucker, Jan; Heidelberg University Hospital, Department of Neurology<br/> Härtig, Florian; Eberhard-Karls-Universität Tübingen Medizinische Fakultät,<br/> Department of Neurology &amp; Stroke, and Hertie Institute for Clinical Brain<br/> Research</p> <p>Richter, Hardy; Eberhard-Karls-Universität Tübingen Medizinische Fakultät,<br/> Department of Neurology &amp; Stroke, and Hertie Institute for Clinical Brain<br/> Research</p> <p>Engelbrecht, Andreas; Heidelberg University Hospital, Department of<br/> Neurology</p> <p>Hartmann, Johannes; Eberhard Karls Universität Tübingen, Department of<br/> Medical Informatics</p> <p>Auer, Jonas; Universität Stuttgart, Department of Computer Science &amp;<br/> Software Engineering</p> <p>Hametner, Christian; University of Heidelberg, Neurology</p> <p>Popp, Erik; UniversitätsKlinikum Heidelberg, Department of Anesthesiology</p> <p>Ringleb, Peter; Heidelberg University Hospital, Department of Neurology</p> <p>Nagel, Simon; Heidelberg University Hospital, Department of Neurology</p> <p>Poli, Sven; Eberhard-Karls-Universität Tübingen Medizinische Fakultät,<br/> Department of Neurology &amp; Stroke, and Hertie Institute for Clinical Brain<br/> Research</p> |
| <b>Primary Subject<br>Heading</b>: | Neurology                                                                                                                                                                                                                                                                                                                                                                                                                                                                                                                                                                                                                                                                                                                                                                                                                                                                                                                                                                                                                                                                                                                                                                                                                                                  |
| Secondary Subject Heading:         | Emergency medicine                                                                                                                                                                                                                                                                                                                                                                                                                                                                                                                                                                                                                                                                                                                                                                                                                                                                                                                                                                                                                                                                                                                                                                                                                                         |
| Keywords:                          | Stroke < NEUROLOGY, ACCIDENT & EMERGENCY MEDICINE, VASCULAR<br>MEDICINE                                                                                                                                                                                                                                                                                                                                                                                                                                                                                                                                                                                                                                                                                                                                                                                                                                                                                                                                                                                                                                                                                                                                                                                    |
|                                    |                                                                                                                                                                                                                                                                                                                                                                                                                                                                                                                                                                                                                                                                                                                                                                                                                                                                                                                                                                                                                                                                                                                                                                                                                                                            |

SCHOLARONE™  
Manuscripts

1  
2  
3  
4  
5  
6  
7  
8  
9  
10  
11  
12  
13  
14  
15  
16  
17  
18  
19  
20  
21  
22  
23  
24  
25  
26  
27  
28  
29  
30  
31  
32  
33  
34  
35  
36  
37  
38  
39  
40  
41  
42  
43  
44  
45  
46  
47  
48  
49  
50  
51  
52  
53  
54  
55  
56  
57  
58  
59  
60

## Prehospital stroke recognition, severity grading, and prediction of large vessel occlusion using a single clinical scale only

Jan C. Purrucker,<sup>1</sup> Florian Härtig,<sup>2</sup> Hardy Richter,<sup>2</sup> Andreas Engelbrecht,<sup>1</sup> Johannes Hartmann,<sup>3</sup> Jonas Auer,<sup>4</sup> Christian Hametner,<sup>1</sup> Erik Popp,<sup>5</sup> Peter A. Ringleb,<sup>1</sup> Simon Nagel<sup>1</sup> and Sven Poli<sup>2</sup>

### Author affiliations:

<sup>1</sup> Department of Neurology, Heidelberg University Hospital, Heidelberg, Germany

<sup>2</sup> Department of Neurology & Stroke, and Hertie Institute for Clinical Brain Research, Tuebingen University Hospital, Tuebingen, Germany

<sup>3</sup> Department of Medical Informatics, University of Tuebingen, Tuebingen, Germany

<sup>4</sup> Department of Computer Science & Software Engineering, University of Stuttgart, Stuttgart, Germany

<sup>5</sup> Department of Anesthesiology, University of Heidelberg, Heidelberg, Germany

### Corresponding author:

Sven Poli, MD MSc; Department of Neurology & Stroke, and Hertie Institute for Clinical Brain Research, Tuebingen University Hospital, Tuebingen, Germany; Phone: +49 7071 2968300, Fax: +49 7071 2925047, E-mail: sven.poli@icloud.com

**Keywords:** Stroke severity grading, triage, large vessel occlusion, emergency medicine

**Word-Count:** Abstract: 247; Main Manuscript: 2626.

**ABSTRACT**

**Objective:** To develop the first fully NIH Stroke Scale (NIHSS)-compatible, all-in-one scale for rapid and comprehensive prehospital stroke assessment including stroke recognition, severity grading and progression monitoring as well as prediction of large vessel occlusion (LVO).

**Methods:** Emergency medical services (EMS) personnel and stroke physicians (N = 326) rated each item of the NIHSS regarding suitability for prehospital use; best-rated items were included. Stroke recognition was evaluated retrospectively in 689 consecutive patients with acute stroke or stroke mimics, prediction of LVO in 741 consecutive ischemic stroke patients with acute vessel imaging independent of admission-NIHSS score.

**Results:** Nine of the NIHSS-items were rated as “suitable for prehospital use”. After excluding two items in order to increase specificity, the final scale (termed shortened NIHSS for EMS, sNIHSS-EMS), it consists of ‘level of consciousness’, ‘facial palsy’, ‘motor arm/leg’, ‘sensory’, ‘language’, and ‘dysarthria’. Sensitivity for stroke recognition of the sNIHSS-EMS is 91% (95% confidence interval [CI] 86–94), specificity 52% (95% CI 47–56). Receiver operating curve analysis revealed an optimal cut-off point for LVO prediction of  $\geq 6$  (sensitivity 70% [95% CI 65–76], specificity 81% [95% CI 76–84], positive predictive value 70 [95% CI 65–75], area under the curve 0.81 [95% CI 0.78–0.84]). Test characteristics were non-inferior to non-comprehensive scales.

**Conclusions:** The sNIHSS-EMS may overcome the sequential use of multiple emergency stroke scales by permitting parallel stroke recognition, severity grading, and LVO prediction. Full NIHSS-item-compatibility allows for evaluation of stroke progression starting at the prehospital phase.

### Strengths and limitations of this study

- Prehospital stroke assessment is increasingly gaining relevance in the era of endovascular interventions for large vessel occlusions. Sound triage decisions will have a major impact on patients' outcomes. As those are left entirely to EMS personnel, it is essential to equip them with an effective tool to guide prehospital triage.
- The new clinical scale (sNIHSS-EMS), developed and validated in this study, is the first scale permitting parallel stroke recognition, severity grading, and LVO prediction. Sequential use of multiple emergency stroke scales may thus be avoided.
- A multinational survey among different emergency medical systems and professions was performed to identify items suitable for use in prehospital emergency situations.
- The sNIHSS-EMS shares full compatibility with the in-hospital gold-standard NIHSS, but remains simple and easy to use.
- The scale will be incorporated into a prehospital stroke triage algorithm in a large regional stroke network, but no prospective data are available yet, which is acknowledged as a limitation.

## INTRODUCTION

A considerable number of stroke scales for prehospital use have been published over recent years.<sup>1,2</sup> However, all these scales only focus on single aspects of acute stroke care, i.e. either stroke recognition,<sup>1,2</sup> severity grading,<sup>3-8</sup> early prediction of outcome,<sup>5</sup> prediction of thrombolysis,<sup>9,10</sup> or large vessel occlusion (LVO).<sup>11-19</sup> Consequently, to provide a comprehensive prehospital stroke assessment, emergency medical services (EMS) personnel must apply at least two scales. However, this is time and resource consuming. Additionally, communication with receiving hospitals might be complicated by the use of multiple scales. Furthermore, most existing scales lack compatibility with the NIH Stroke Scale (NIHSS), the in-hospital 'gold-standard' for stroke severity grading.<sup>2</sup> This impedes the seamless evaluation of stroke progression from pre- to in-hospital care. In the era of endovascular treatment of LVO, decisions regarding direct emergency referrals to specialized comprehensive stroke centers will have a major impact on patients' outcomes.<sup>20,21</sup> As those are left entirely to EMS personnel, it is essential to equip them with an effective tool to guide prehospital triage.

We present the development and validation of a novel comprehensive stroke scale, specifically designed for prehospital use with input from EMS. Our aim was to allow for parallel stroke recognition, severity grading and – owing to full NIHSS-compatibility – progression monitoring as well as LVO prediction.

## METHODS

### International online survey

We invited non-neurologic EMS personnel (paramedics and emergency physicians) and stroke physicians from Austria, Germany, and Switzerland to rate each individual NIHSS item regarding their applicability in a prehospital emergency setting. Invitations were sent out via the German Stroke Society (DSG), the German Society for Neuro-Intensive Care and Emergency Medicine (DGNI), as well as EMS providers.

1 Participation was voluntary, no financial incentive was offered, and participation was  
2  
3 only allowed once. Non-neurologic EMS personnel do not use the NIHSS routinely and  
4  
5 did not receive specific NIHSS training before the survey. For each NIHSS item, we  
6  
7 created and provided a short video demonstrating in-hospital bedside assessment  
8  
9 according to the NIHSS training instructions (a screenshot is shown as Figure 1A in the  
10  
11 Appendix). Having watched the video, participants were asked to rate each NIHSS item  
12  
13 regarding its suitability for prehospital use on a 6-item scale, ranging from 0 (most  
14  
15 suitable) to 5 (most unsuitable). Ratings were automatically entered into a database  
16  
17 together with name (optional), profession, professional experience, and place of work.  
18  
19 Participation was possible from November 19<sup>th</sup> 2015, until April 15<sup>th</sup> 2016, the pre-  
20  
21 specified closing date.  
22  
23  
24  
25  
26  
27

### 28 **Patient cohorts**

29  
30 Test characteristics of the newly designed scale were calculated with regard to  
31  
32 performance in stroke recognition and prediction of acute LVO using two distinct  
33  
34 clinical cohorts described below.  
35

36 For stroke recognition, we used a prospectively collected cohort of consecutive patients  
37  
38 with acute ischemic or hemorrhagic stroke and stroke mimics, which had already served  
39  
40 as a validation cohort in a previous comparison of existing stroke scales.<sup>2</sup> In summary,  
41  
42 the database consists of pseudonymized data of consecutive patients (including  
43  
44 comatose) with preclinical 'suspected acute CNS disorder' admitted to the Emergency  
45  
46 Room of the Department of Neurology, Heidelberg University Hospital, Germany by  
47  
48 EMS between November 2007 and August 2010. For all patients, a full-length NIHSS  
49  
50 score assessed by certified raters was available at admission. The diagnostic reference  
51  
52 standard was the diagnosis at hospital discharge. Cases were dichotomized (by the  
53  
54 authors AE and CH) in stroke and non-stroke, i.e. stroke-mimics. AE and CH were  
55  
56  
57  
58  
59  
60

1 blinded for the admission NIHSS and sNIHSS-EMS scores. Details of the sample size  
2 calculation are described in <sup>2</sup>.  
3  
4

5 Test characteristics regarding the prediction of LVO were calculated in a prospectively  
6 collected second cohort consisting of consecutive patients with acute ischemic stroke,  
7 admitted to the Department of Neurology, Tuebingen University Hospital, Germany  
8 between January 2013 and July 2015. In accordance with local standard operating  
9 procedures, all received acute vessel imaging on admission independent of stroke  
10 severity. Neuroradiological reports and original images were reviewed by the authors  
11 HR and SP for presence of acute LVO. HR and SP were blinded to patients' NIHSS  
12 scores. Cases were considered as LVO-positive if an acute symptomatic occlusion was  
13 present in one of the following arteries: common carotid artery (CCA), internal carotid  
14 artery (ICA), carotid T, middle cerebral artery (MCA, including M1/M2 segments),  
15 anterior cerebral artery (ACA), basilar artery (BA), or posterior cerebral artery (PCA).  
16  
17  
18  
19  
20  
21  
22  
23  
24  
25  
26  
27  
28  
29  
30  
31

### 32 **Statistics**

33  
34 To determine suitable items for use in the prehospital phase, we analyzed the online  
35 survey response data set; median and interquartile ranges (IQR) were calculated.  
36  
37  
38 NIHSS-items receiving median scores of 0 and 1 were – as predefined – regarded  
39 eligible for further consideration. Rating differences between the professional groups  
40 (i.e. non-neurologic EMS personnel and stroke physicians) were determined using the  
41 Mann-Whitney-U test. For the calculation of test performance regarding stroke  
42 recognition, the sNIHSS-EMS score was dichotomized as indicative of stroke (score  $\geq$   
43 1), or not (score = 0). Sensitivity (the proportion of stroke patients who had a positive  
44 test, i.e. indicative of stroke) and specificity (the proportion of non-stroke patients who  
45 had a negative test), positive predictive value (PPV), and negative predictive value  
46 (NPV) were calculated with 95% confidence intervals (CI). To determine the predictive  
47 power for LVO detection, we calculated sensitivity, specificity, PPV, and NPV, with  
48  
49  
50  
51  
52  
53  
54  
55  
56  
57  
58  
59  
60



1 95% CI for each scale score ranging from 0 to 29 for the sNIHSS-EMS, and from 0 to  
2  
3 42 for the original NIHSS. Accuracy is reported additionally. Receiver operating curve  
4  
5 (ROC) analysis was performed, area under the curve (AUC) and Youden's index were  
6  
7 calculated. For comparison of the sNIHSS-EMS with existing dedicated LVO  
8  
9 prediction scales,<sup>4, 11-13, 15, 16</sup> we calculated the corresponding scores using the NIHSS-  
10  
11 equivalents and cut-offs as stated in the original publications. Statistical comparison of  
12  
13 AUCs was performed according to DeLong et al.<sup>22</sup> Calculation of the Los Angeles  
14  
15 Motor Scale (LAMS) for our LVO cohort was not possible since the item "grip-strength"  
16  
17 was not routinely documented. P values were 2-sided with values less than .05  
18  
19 considered statistically significant. SPSS (V23.0.0.2, IBM, New York, USA), MedCalc  
20  
21 (V16.8.4, Ostend, Belgium) and GraphPad Prism (V6.0b, San Diego, California, USA)  
22  
23 were used for data handling and analysis, and graphic presentation. This study was  
24  
25 performed in accordance with the STARD guidelines for studies on diagnostic tests.  
26  
27  
28  
29  
30  
31  
32  
33  
34  
35  
36  
37  
38  
39  
40  
41  
42  
43  
44  
45  
46  
47  
48  
49  
50  
51  
52  
53  
54  
55  
56  
57  
58  
59  
60

## RESULTS

### Scale development

A total of 326 participants responded to our international online survey (Austria, Germany, and Switzerland), with the majority (57%) representing non-neurologic EMS personnel (33% paramedics and 24% prehospital emergency physicians); 33% stroke physicians, and 10% not specified. Participants reported a high level of professional experience (>10 years, 45%; <5 years, 20%).

Nine of the NIHSS-items received a median score of 0 or 1 (equivalent to most suitable and suitable for prehospital use), whereas the items 'best gaze', 'visual', 'limb ataxia', and 'extinction' were rated as less suitable and thus removed from further analyses (Table 1A in the Appendix). Although rating by stroke physicians was more rigorous, item selection based on median ratings of 0 or 1 was not shifted by the professional vote (Table 1A).

We decided to exclude items 1b (LOC questions) and 1c (LOC commands). Despite being easily assessable and thus rated suitable for prehospital use, these two items are either present in the absence of stroke as frequent features of non-stroke conditions (e.g. dementia, infection or dehydration)<sup>23</sup> or heavily influenced by aphasia<sup>24</sup> and thus redundant for stroke recognition. The new 7-items scale was termed 'shortened NIHSS for emergency medical services' (sNIHSS-EMS; Table 2).

### Stroke recognition and severity grading

In our stroke recognition validation cohort of 689 consecutive patients with 'suspected acute CNS disorder', 29% received 'stroke' as discharge diagnosis. Patients with ischemic stroke (n=200) had an admission-NIHSS of 9 (IQR 4–17), patients with hemorrhagic stroke (n=55) of 17 (IQR 5–35). Non-stroke patients (n = 489) had a median admission-NIHSS of 1 (IQR 0–6). The sNIHSS-EMS was found to have 90.5% (95% CI 85.6–94.2) sensitivity and 51.5% (95% CI 47.0–56.1) specificity for stroke

1 recognition (PPV 43.3% [95% CI 38.5–48.2], NPV 93.0% [95% CI 89.3–95.6]). Cross  
2  
3 tabulations are shown in Table 3A in the Appendix. Excluding comatose patients (n =  
4  
5 49), sensitivity was 89.1% (95% CI 83.6–93.3) and specificity 54.2% (95% CI 49.5–  
6  
7 58.8).  
8

### 11 **LVO prediction**

12  
13  
14 In the distinct LVO validation cohort of consecutive 741 ischemic stroke patients with  
15  
16 acute vessel imaging independent of their admission-NIHSS score (86.9% CTA; see  
17  
18 Table A2 for patient characteristics), a ROC analysis of the sNIHSS-EMS regarding  
19  
20 LVO prediction revealed a maximal Youden index at the cut-point of  $\geq 6$  (sensitivity  
21  
22 70.3% [95% CI 64.7–75.5], specificity 80.7% [95% CI 76.8–84.3]; Figure 1, Table 2).  
23  
24 For comparison, in the original NIHSS, the maximal Youden index was calculated for a  
25  
26 cut-point of  $\geq 9$  (Table 2). Combined re-inclusion of the NIHSS items ‘visual’, ‘gaze’  
27  
28 and ‘extinction’ improved test characteristics (AUC 0.826 vs. 0.808,  $p < 0.001$ ). Re-  
29  
30 inclusion of singular items did not improve test characteristics.  
31  
32

33  
34 We validated the sNIHSS-EMS against existing LVO prediction scales through  
35  
36 applying them to our cohort and calculation of ROC and Youden indices (Table 3,  
37  
38 Figure 1). No statistically significant differences compared to existing scales were  
39  
40 found, except for the full-length NIHSS. Notably, due to characteristics of our cohort,  
41  
42 external validation based on maximal Youden indices led to cut-points different from  
43  
44 those reported in the respective original publications (Table 3).  
45  
46  
47  
48

### 49 **DISCUSSION**

50  
51  
52 The sNIHSS-EMS is the first comprehensive stroke scale to provide parallel stroke  
53  
54 recognition, severity grading, and LVO prediction. Test characteristics with respect to  
55  
56 stroke recognition and severity grading as well as identification of patients with large  
57  
58 vessel occlusion are non-inferior to other, non-comprehensive, scales. Furthermore,  
59  
60

1 compatibility with the item assessment in the full-length NIHSS allows for continuous  
2  
3 evaluation of the clinical course from pre- to in-hospital care. It may thus represent the  
4  
5 ideal stroke scale for routine use in pre-hospital emergency medical care.  
6

7 As previously shown by our work-group,<sup>2</sup> some of the available stroke severity scales<sup>3, 5</sup>  
8  
9 may be used for stroke recognition with similar sensitivity and specificity when  
10  
11 compared to scales developed for stroke recognition alone. Existing scales, however,  
12  
13 either include items requiring complex assessment (such as extinction<sup>12, 16</sup>) or exclude  
14  
15 items highly relevant for evaluation of stroke progression (such as level of  
16  
17 consciousness, arm or leg motor function<sup>4, 5, 12</sup>).  
18  
19

20 Sensitivity of the sNIHSS-EMS regarding stroke recognition (91%) was superior to  
21  
22 previously published results for the simpler CPSS (85%) and FAST (87%) evaluated in  
23  
24 the same cohort of patients.<sup>2</sup> In contrast, specificity (52%) was lower compared to the  
25  
26 CPSS (65%) and FAST (64%).<sup>2</sup> As the overall burden of a missed stroke outweighs the  
27  
28 potentially increased workload of emergency departments, higher sensitivity may be  
29  
30 considered more relevant. Simpler stroke scales may provide a slightly faster initial  
31  
32 assessment, but subsequently require the use of at least one additional scale to  
33  
34 determine stroke severity or predict LVO. The use of multiple scales, however, may be  
35  
36 error-prone and complicates communication with receiving hospitals.  
37  
38

39 According to recent European and American recommendations, clinical screening tools  
40  
41 may be considered in order to facilitate direct transport of patients with suspected LVO  
42  
43 to Comprehensive Stroke Centers (CSC) with endovascular facility.<sup>21, 25</sup> For LVO  
44  
45 prediction, our analysis revealed a maximum Youden index for the cut-point of  $\geq 6$  for  
46  
47 the sNIHSS-EMS and, in accordance with previous findings, 9 for the original  
48  
49 NIHSS.<sup>26</sup> Importantly, to adjust for hospital capacities and local stroke network  
50  
51 requirements, this threshold can be adapted: higher cut-points result in an increased  
52  
53 specificity (Table 2) leading to reduced numbers of patients bypassing Acute Stroke  
54  
55  
56  
57  
58  
59  
60

1 Ready Hospitals (ASRH) or Primary Stroke Centers (PSC) without endovascular  
2 facility.  
3

4  
5 The NIHSS items 'visual', 'gaze' and 'extinction' are part of some dedicated LVO  
6 prediction scales,<sup>11, 12, 15, 16</sup> but were not included in the sNIHSS-EMS due to  
7 unfavorable ratings regarding prehospital assessability. Re-inclusion of each separate  
8 item did not result in the presumed higher predictive value for LVO detection. Only  
9 combined re-inclusion of all three rejected items led to marginally enhanced test  
10 characteristics, but would result in a significantly increased number of complex-to-  
11 assess items and thus an inconvenient scale.  
12

13  
14 For comparison with existing scales, we externally validated dedicated LVO prediction  
15 scales in our cohort by using the cut-points as provided in the original publications and  
16 found the sNIHSS-EMS to offer comparable sensitivity and specificity (Table 4). Better  
17 test characteristics reported in the original publications for some scales may be due to  
18 differences in the definition of LVO (e.g. the 3I-SS focused on carotid T and M1  
19 occlusions only,<sup>11</sup> while the LAMS also included M3/4 occlusions<sup>17</sup>).  
20

21  
22 LVO prediction by clinical scales has recently been criticized due to the high false-  
23 negative rate compared to vessel imaging.<sup>18, 27</sup> The sNIHSS-EMS is not intended to  
24 substitute in-hospital acute vessel imaging,<sup>18</sup> and prehospital acute vessel imaging is  
25 still an exception.<sup>28</sup> Currently, mainly due to the narrow time window for effective  
26 intravenous thrombolysis, patients are transferred to the closest stroke center regardless  
27 of LVO suspicion. In the era of interventional thrombectomy however, ASRH or PSC  
28 may have to be bypassed in favor of CSC with endovascular facility in sensibly selected  
29 cases.  
30

31  
32 Based on clinical criteria alone, the sNIHSS-EMS identifies the majority of patients  
33 with acute LVO, i.e. those patients who might benefit from a direct transfer to CSC with  
34 endovascular facility. In addition, the minority of LVO patients not bypassed to  
35  
36  
37  
38  
39  
40  
41  
42  
43  
44  
45  
46  
47  
48  
49  
50  
51  
52  
53  
54  
55  
56  
57  
58  
59  
60

1 endovascular ready CSC (i.e. total score < 6 despite LVO) are not lost to endovascular  
2 therapy since secondary transportation to an endovascular ready CSC is still possible.  
3  
4 The sNIHSS-EMS is designed to permit the monitoring of stroke progression from pre-  
5 to in-hospital care on the item-level, a feature that has been neglected in other scales.  
6  
7 Clinical implications include the earlier recognition of symptom fluctuation with  
8 consequences e.g. for blood pressure management or selection of imaging modality. In  
9 practice, if a '2' is scored for 'Motor Leg left' on the sNIHSS-EMS, a '4' on the same  
10 item during routine NIHSS evaluation in the ER points to early clinical deterioration.  
11  
12 Clinical scores using merged items (e.g. 'hemiparesis'<sup>11</sup> or 'language/dysarthria'<sup>9</sup>) or  
13 modified item scoring (e.g. motor function scoring from 0 to 2 instead of 0 to 4<sup>12, 13, 15-  
14 17</sup>) impede seamless monitoring of symptom progression.  
15  
16 Despite the positive aspects of the sNIHSS-EMS, some limitations of the present study  
17 require further discussion. Test characteristics regarding LVO prediction were  
18 calculated in a cohort of patients with confirmed ischemic stroke because determination  
19 of the 'true' LVO prediction threshold is only possible in a cohort without stroke  
20 mimics or hemorrhagic stroke. However, although this approach is in concordance with  
21 methods used in the past in the design of dedicated LVO prediction scales,<sup>13, 15, 17</sup> future  
22 prospective validation in the prehospital target population will be necessary to  
23 determine prevalence-dependent test characteristics. As patients with stroke mimics  
24 (and thus no LVO) exhibit low NIHSS scores, inclusion of these cases into the analyses,  
25 would lead to an increased specificity of our cut-points. The sNIHSS-EMS is not able to  
26 differentiate between ischemic and hemorrhagic stroke. This might not be a  
27 disadvantage as severely affected hemorrhagic stroke patients benefit from direct  
28 admission to a CSC with neurological intensive care capacity.<sup>29</sup>  
29  
30 As a strength of this study, LVO was evaluated by CTA or MRA, and not with less  
31 accurate duplex sonography as done in previous studies evaluating LVO prediction  
32 scales.<sup>12, 17</sup> The sNIHSS-EMS was primarily designed to fulfill requirements for  
33  
34  
35  
36  
37  
38  
39  
40  
41  
42  
43  
44  
45  
46  
47  
48  
49  
50  
51  
52  
53  
54  
55  
56  
57  
58  
59  
60

1 prehospital use. Although kept simple, additional training on the new scale is  
2  
3 recommended. Participation of different EMS systems in design and derivation of the  
4  
5 sNIHSS-EMS enhances generalizability to further EMS systems around the world.  
6  
7 Moreover, the sNIHSS-EMS may also serve in telemedicine with usually non-  
8  
9 neurologic physicians performing the initial patient examination.  
10  
11

## 12 13 14 **CONCLUSION**

15  
16 The sNIHSS-EMS may overcome the need for sequential use of multiple emergency  
17  
18 stroke scales by enabling parallel stroke recognition, severity grading, and LVO  
19  
20 prediction. Full NIHSS-item-compatibility permits evaluation of stroke progression  
21  
22 starting from the prehospital phase. Offering comparable test characteristics as  
23  
24 dedicated scales, the sNIHSS-EMS may be a promising tool for rapid and  
25  
26 comprehensive prehospital stroke assessment and triage.  
27  
28  
29  
30  
31  
32  
33

## 34 **Acknowledgments**

35  
36 We thank all survey participants for their contribution. Those who gave consent to the  
37  
38 publication of their names are listed in the Appendix. We thank Louise Alice Härtig for  
39  
40 language revision of the manuscript.  
41  
42  
43  
44

## 45 **Ethical approval**

46  
47 Ethic approvals were obtained from the ethics committee of the Medical Faculty  
48  
49 Heidelberg and the ethics committee at the University Hospital Tuebingen, Germany  
50  
51 (protocol-numbers S-109/2013 and 648/2015BO2, respectively). Written informed  
52  
53 consent was waived.  
54  
55  
56  
57  
58  
59  
60

**Funding**

This study was investigator initiated, without funding.

**Contributorship**

SP and JCP conceived and designed the study. EP provided the EMS data. HR and SP created and validated the LVO prediction database. SP, JCP, AE and CH collected and analyzed the data. JH and JA developed and maintained the online survey. JCP, FH, SP drafted the article. JCP, HR, FH, CH, PAR, SN, SP revised the manuscript.

**Guarantor**

SP and JCP take the responsibility for the paper as a whole.

**Declaration of Conflicting Interests**

Personal fees, travel support, speaker honoraria, or research grants were received from Bayer Healthcare (FH, HR, PR, SN, SP), BeneChill (SP), BMS Pfizer (PR, SP), Boehringer-Ingelheim (JCP, PR, SN, SP), Brainomix Ltd. (SN), Covidien (SP), C.R. Bard (SP), EMCOOLS (SP), Helena Laboratories (FH, SP), HVM Medical (SP), Medtronic (SN), Pfizer (JCP, SN), Raumedic (SP), ZOLL (SP), The other authors report no conflicts of interest.

**Provenance and peer review:** Not commissioned; externally peer reviewed.

**Data sharing statement:** No additional data are available.



## References

1. Brandler ES, Sharma M, Sinert RH, *et al*. Prehospital stroke scales in urban environments: a systematic review. *Neurology* 2014;82:2241-9.
2. Purruicker JC, Hametner C, Engelbrecht A, *et al*. Comparison of stroke recognition and stroke severity scores for stroke detection in a single cohort. *J Neurol Neurosurg Psychiatry* 2015;86:1021-8.
3. Kimura K, Inoue T, Iguchi Y, *et al*. Kurashiki prehospital stroke scale. *Cerebrovasc Dis* 2008;25:189-91.
4. Llanes JN, Kidwell CS, Starkman S, *et al*. The Los Angeles Motor Scale (LAMS): a new measure to characterize stroke severity in the field. *Prehosp Emerg Care* 2004;8:46-50.
5. Tirschwell DL, Longstreth WT, Jr., Becker KJ, *et al*. Shortening the NIH Stroke scale for use in the prehospital setting. *Stroke* 2002;33:2801-6.
6. Lyden P, Brott T, Tilley B, *et al*. Improved reliability of the NIH Stroke Scale using video training. NINDS TPA Stroke Study Group. *Stroke* 1994;25:2220-6.
7. Meyer BC, Hemmen TM, Jackson CM, *et al*. Modified National Institutes of Health Stroke Scale for use in stroke clinical trials: prospective reliability and validity. *Stroke* 2002;33:1261-6.
8. Whelley-Wilson CM, Newman GC. A stroke scale for emergency triage. *J Stroke Cerebrovasc Dis* 2004;13:247-53.
9. Iguchi Y, Kimura K, Watanabe M, *et al*. Utility of the Kurashiki Prehospital Stroke Scale for hyperacute stroke. *Cerebrovasc Dis* 2011;31:51-6.
10. Hasegawa Y, Sasaki N, Yamada K, *et al*. Prediction of thrombolytic therapy after stroke-bypass transportation: the Maria Prehospital Stroke Scale score. *J Stroke Cerebrovasc Dis* 2013;22:514-9.

- 1  
2  
3  
4  
5  
6  
7  
8  
9  
10  
11  
12  
13  
14  
15  
16  
17  
18  
19  
20  
21  
22  
23  
24  
25  
26  
27  
28  
29  
30  
31  
32  
33  
34  
35  
36  
37  
38  
39  
40  
41  
42  
43  
44  
45  
46  
47  
48  
49  
50  
51  
52  
53  
54  
55  
56  
57  
58  
59  
60
11. Singer OC, Dvorak F, du Mesnil de Rochemont R, *et al.* A simple 3-item stroke scale: comparison with the National Institutes of Health Stroke Scale and prediction of middle cerebral artery occlusion. *Stroke* 2005;36:773-6.
  12. Perez de la Ossa N, Carrera D, Gorchs M, *et al.* Design and validation of a prehospital stroke scale to predict large arterial occlusion: the rapid arterial occlusion evaluation scale. *Stroke* 2014;45:87-91.
  13. Katz BS, McMullan JT, Sucharew H, *et al.* Design and validation of a prehospital scale to predict stroke severity: Cincinnati Prehospital Stroke Severity Scale. *Stroke* 2015;46:1508-12.
  14. Teleb MS, Ver Hage A, Carter J, *et al.* Stroke vision, aphasia, neglect (VAN) assessment-a novel emergent large vessel occlusion screening tool: pilot study and comparison with current clinical severity indices. *J Neurointerv Surg* 2017;9:122-6.
  15. Hastrup S, Damgaard D, Johnsen SP, *et al.* Prehospital Acute Stroke Severity Scale to Predict Large Artery Occlusion: Design and Comparison With Other Scales. *Stroke* 2016;47:1772-6.
  16. Lima FO, Silva GS, Furie KL, *et al.* Field Assessment Stroke Triage for Emergency Destination: A Simple and Accurate Prehospital Scale to Detect Large Vessel Occlusion Strokes. *Stroke* 2016;47:1997-2002.
  17. Nazliel B, Starkman S, Liebeskind DS, *et al.* A brief prehospital stroke severity scale identifies ischemic stroke patients harboring persisting large arterial occlusions. *Stroke* 2008;39:2264-7.
  18. Heldner MR, Hsieh K, Broeg-Morvay A, *et al.* Clinical prediction of large vessel occlusion in anterior circulation stroke: mission impossible? *J Neurol* 2016;263:1633-40.
  19. Vanacker P, Heldner MR, Amiguet M, *et al.* Prediction of Large Vessel Occlusions in Acute Stroke: National Institute of Health Stroke Scale Is Hard to Beat. *Crit Care Med* 2016;44:e336-43.

- 1  
2  
3  
4  
5  
6  
7  
8  
9  
10  
11  
12  
13  
14  
15  
16  
17  
18  
19  
20  
21  
22  
23  
24  
25  
26  
27  
28  
29  
30  
31  
32  
33  
34  
35  
36  
37  
38  
39  
40  
41  
42  
43  
44  
45  
46  
47  
48  
49  
50  
51  
52  
53  
54  
55  
56  
57  
58  
59  
60
20. Rinaldo L, Brinjikji W, McCutcheon BA, *et al.* Hospital transfer associated with increased mortality after endovascular revascularization for acute ischemic stroke. *J Neurointerv Surg* 2016.
21. Pride GL, Fraser JF, Gupta R, *et al.* Prehospital care delivery and triage of stroke with emergent large vessel occlusion (ELVO): report of the Standards and Guidelines Committee of the Society of Neurointerventional Surgery. *J Neurointerv Surg* 2016.
22. DeLong ER, DeLong DM, Clarke-Pearson DL. Comparing the areas under two or more correlated receiver operating characteristic curves: a nonparametric approach. *Biometrics* 1988;44:837-45.
23. Nor AM, Davis J, Sen B, *et al.* The Recognition of Stroke in the Emergency Room (ROSIER) scale: development and validation of a stroke recognition instrument. *Lancet Neurol* 2005;4:727-34.
24. Majerus S, Bruno MA, Schnakers C, *et al.* The problem of aphasia in the assessment of consciousness in brain-damaged patients. *Prog Brain Res* 2009;177:49-61.
25. Fiehler J, Cognard C, Gallitelli M, *et al.* European Recommendations on Organisation of Interventional Care in Acute Stroke (EROICAS). *Int J Stroke* 2016;11:701-16.
26. Heldner MR, Zubler C, Mattle HP, *et al.* National Institutes of Health stroke scale score and vessel occlusion in 2152 patients with acute ischemic stroke. *Stroke* 2013;44:1153-7.
27. Turc G, Maier B, Naggara O, *et al.* Clinical Scales Do Not Reliably Identify Acute Ischemic Stroke Patients With Large-Artery Occlusion. *Stroke* 2016;47:1466-72.
28. John S, Stock S, Masaryk T, *et al.* Performance of CT Angiography on a Mobile Stroke Treatment Unit: Implications for Triage. *J Neuroimaging* 2016;26:391-4.

1 29. Diringer MN, Edwards DF. Admission to a neurologic/neurosurgical intensive  
2 care unit is associated with reduced mortality rate after intracerebral hemorrhage. *Crit*  
3  
4  
5 *Care Med* 2001;29:635-40.  
6  
7  
8  
9  
10  
11  
12  
13  
14  
15  
16  
17  
18  
19  
20  
21  
22  
23  
24  
25  
26  
27  
28  
29  
30  
31  
32  
33  
34  
35  
36  
37  
38  
39  
40  
41  
42  
43  
44  
45  
46  
47  
48  
49  
50  
51  
52  
53  
54  
55  
56  
57  
58  
59  
60

**Table 1** The shortened NIH Stroke Scale for Emergency Medical Services (sNIHSS-EMS).

| No.        | sNIHSS-EMS item        | Equivalent to the<br>NIHSS-item | Range      |
|------------|------------------------|---------------------------------|------------|
| 1          | Level of Consciousness | 1a                              | 0 – 3      |
| 2          | Facial Palsy           | 4                               | 0 – 3      |
| 3          | Motor Arm (R+L)        | 5                               | 0 – 4 / UN |
| 4          | Motor Leg (R+L)        | 6                               | 0 – 4 / UN |
| 5          | Sensory                | 8                               | 0 – 2      |
| 6          | Best Language          | 9                               | 0 – 3      |
| 7          | Dysarthria             | 10                              | 0 – 2 / UN |
| <b>Sum</b> |                        | –                               | 0 – 29     |

Range indicates possible scores;

Abbreviations: R+L = right and left; UN = untestable (motor items: amputation or joint fusion, dysarthria: intubation or other physical barrier).

**Table 2** Cut-off points for prediction of acute large vessel occlusion.

| Cut-off Point | Sensitivity        | Specificity        | Positive Predictive Value | Negative Predictive Value | Accuracy | <i>J</i> |
|---------------|--------------------|--------------------|---------------------------|---------------------------|----------|----------|
| sNIHSS-       |                    |                    |                           |                           |          |          |
| EMS           |                    |                    |                           |                           |          |          |
| 5             | 74.8 (69.4 – 79.7) | 73.4 (69.1 – 77.4) | 66.4 (59.0 – 69.5)        | 81.9 (77.8 – 85.6)        | 74.0     | 0.482    |
| 6*            | 70.3 (64.7 – 75.5) | 80.7 (76.8 – 84.3) | 70.1 (64.5 – 75.3)        | 80.9 (76.9 – 84.4)        | 76.7     | 0.511    |
| 7             | 65.2 (59.4 – 70.6) | 85.8 (82.2 – 88.9) | 74.7 (68.9 – 79.9)        | 79.3 (75.4 – 82.8)        | 77.7     | 0.510    |
| NIHSS         |                    |                    |                           |                           |          |          |
| 8             | 72.4 (66.9 – 77.5) | 80.7 (76.8 – 84.3) | 70.7 (65.2 – 75.8)        | 82.0 (78.1 – 85.4)        | 77.5     | 0.531    |
| 9*            | 69.3 (63.7 – 74.6) | 85.4 (81.8 – 88.5) | 75.3 (69.7 – 80.3)        | 81.2 (77.4 – 84.6)        | 79.1     | 0.547    |
| 10            | 65.9 (60.1 – 71.3) | 88.0 (84.7 – 90.9) | 78.0 (72.2 – 83.0)        | 80.0 (76.2 – 83.5)        | 79.4     | 0.539    |

Abbreviations: NIHSS = NIH Stroke Scale; sNIHSS-EMS, shortened NIHSS for emergency medical services.

Data are % (95% CI). *J* indicates Youden's-Index, \* indicates the optimal cut-off according to the Youden index.

**Table 3** Comparison of clinical scales for prehospital prediction of large vessel occlusions

|                                                                     | 3I-SS | LAMS | RACE | CPSSS | FAST-<br>ED | PASS | sNIHSS-<br>EMS |
|---------------------------------------------------------------------|-------|------|------|-------|-------------|------|----------------|
| Reference                                                           | 11    | 17   | 12   | 13    | 16          | 15   | —              |
| Scale characteristics                                               |       |      |      |       |             |      |                |
| No. of items assessed                                               | 3     | 3    | 5*   | 3     | 5           | 3    | 7              |
| Score range                                                         | 0–6   | 0–5  | 0–9  | 0–4   | 0–9         | 0–3  | 0–29           |
| NIHSS compatible item assessment                                    | —     | —    | —    | —     | —           | —    | ●              |
| Stroke Recognition                                                  | —     | —    | —    | —     | —           | —    | ●              |
| Stroke severity grading                                             | —     | (●)  | (●)  | —     | —           | —    | ●              |
| Large vessel occlusion prediction                                   | ●     | ●    | ●    | ●     | ●           | ●    | ●              |
| LVO prediction, test characteristics, own cohort (N = 741, 44% LVO) |       |      |      |       |             |      |                |
| Cut-point used †                                                    | ≥ 4   | ≥ 4  | ≥ 5  | ≥ 2   | ≥ 4         | ≥ 2  | ≥ 6            |
| Sensitivity                                                         | 40%   | —‡   | 59%  | 59%   | 60%         | 68%  | 70%            |

|   |             |     |    |     |     |     | Page 22 |     |
|---|-------------|-----|----|-----|-----|-----|---------|-----|
| 1 | Specificity | 95% | -‡ | 91% | 89% | 90% | 84%     | 81% |
| 2 |             |     |    |     |     |     |         |     |
| 3 | PPV         | 85% | -‡ | 81% | 77% | 80% | 74%     | 70% |
| 4 |             |     |    |     |     |     |         |     |
| 5 | NPV         | 71% | -‡ | 78% | 77% | 78% | 81%     | 81% |
| 6 |             |     |    |     |     |     |         |     |

LVO prediction, test characteristics, original cohorts§

| Cohort (N   | 83    | 119   | 357     | 303   | 727   | 3127    |   |
|-------------|-------|-------|---------|-------|-------|---------|---|
| (%LVO))     | (35%) | (62%) | (21%)** | (73%) | (33%) | (35%)†† | - |
| Sensitivity | 67%   | 81%   | 85%     | 83%   | 61%   | 66%     | - |
| Specificity | 92%   | 89%   | 68%     | 40%   | 89%   | 83%     | - |
| PPV         | 74%   | nd    | 42%     | nd    | 72%   | 68%     | - |
| NPV         | 89%   | nd    | 94%     | nd    | 82%   | 81%     | - |

Abbreviations: nd: no data.

\* If right sided hemiparesis, aphasia is assessed, if left sided hemiparesis, agnosia.

† Cut-points according to original publications. Based on the Youden indices calculated from our data, optimal cut-points are different: 3I-SS  $\geq 2$ , RACE  $\geq 3$ , CPSSS  $\geq 1$ , FAST-ED  $\geq 3$ .

‡ Grip-strength was not routinely documented, therefore external validation of the LAMS was not possible.

§ Definition of large vessel occlusions according to original publications (3I-SS: carotid-T or M1; LAMS: ICA, M1, M2, M3/4, ACA; RACE: terminal ICA, M1, tandem CCA/ICA+M1, BA; CPSSS: ICA, M1, tandem ICA+M2, BA; FAST-ED: ICA, M1, M2, BA; PASS: "visible clot in the anterior or posterior circulation on CTA or MRA"; abbreviations within the main text).

\*\* Including cases assessed by transcranial duplex only (N = 197).

†† Only patients who received intravenous tPA; 2/3 of entire cohort were taken as a random sample for derivation. In the remaining 1/3, sensitivity was 61%, specificity 83%.



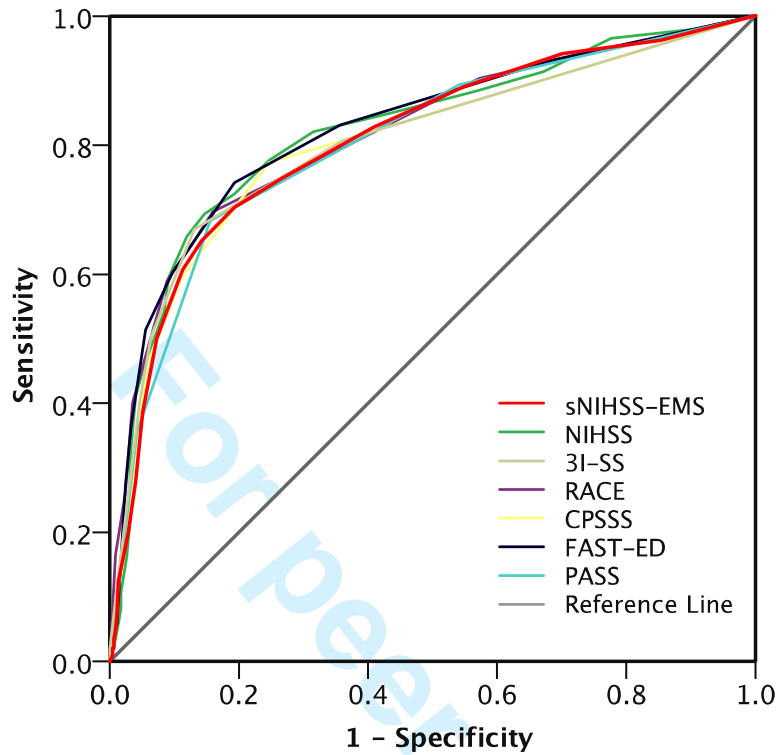

| Scale      | Area Under the Curve (95% CI) | <i>p</i>    |
|------------|-------------------------------|-------------|
| sNIHSS-EMS | 0.808 (0.775 – 0.841)         | <i>ref.</i> |
| NIHSS      | 0.821 (0.788 – 0.854)         | 0.019       |
| 3I-SS      | 0.804 (0.770 – 0.838)         | 0.697       |
| RACE       | 0.816 (0.784 – 0.849)         | 0.314       |
| CPSSS      | 0.802 (0.767 – 0.836)         | 0.605       |
| FAST-ED    | 0.825 (0.793 – 0.857)         | 0.078       |
| PASS       | 0.805 (0.771 – 0.838)         | 0.766       |

**Figure 1.** Receiver operating curves for prediction of acute large vessel occlusion.

Abbreviations: AUC: area under the curve; *ref.*: reference.

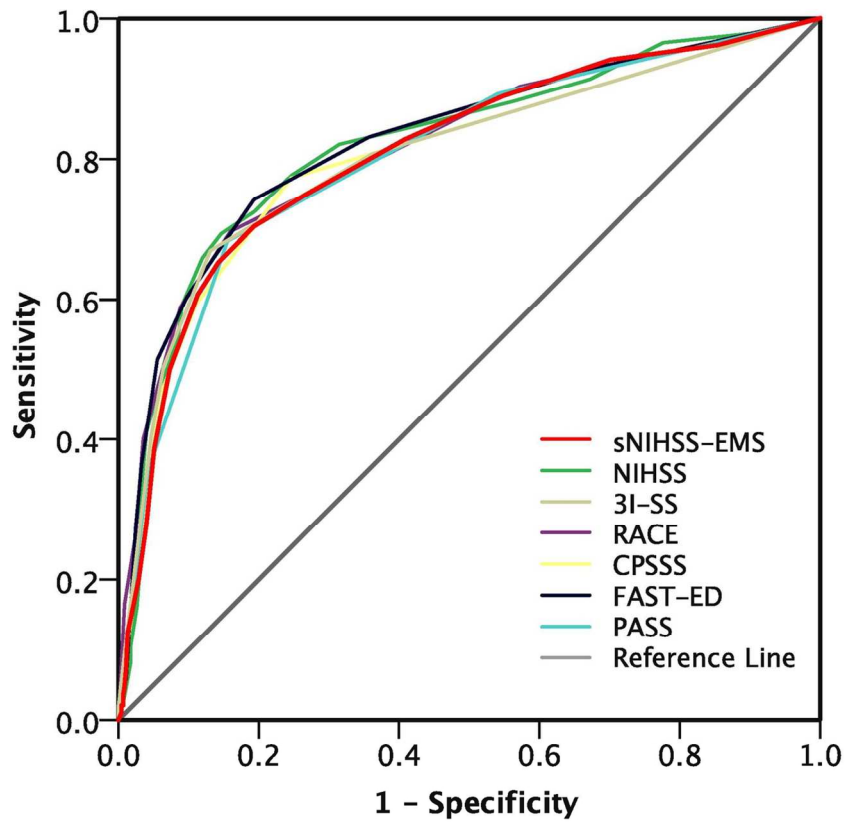

| Scale      | Area Under the Curve (95% CI) | <i>p</i>    |
|------------|-------------------------------|-------------|
| sNIHSS-EMS | 0.808 (0.775 – 0.841)         | <i>ref.</i> |
| NIHSS      | 0.821 (0.788 – 0.854)         | 0.019       |
| 3I-SS      | 0.804 (0.770 – 0.838)         | 0.697       |
| RACE       | 0.816 (0.784 – 0.849)         | 0.314       |
| CPSSS      | 0.802 (0.767 – 0.836)         | 0.605       |
| FAST-ED    | 0.825 (0.793 – 0.857)         | 0.078       |
| PASS       | 0.805 (0.771 – 0.838)         | 0.766       |

116x150mm (300 x 300 DPI)

1  
2  
3  
4  
5  
6  
7  
8  
9  
10  
11  
12  
13  
14  
15  
16  
17  
18  
19  
20  
21  
22  
23  
24  
25  
26  
27  
28  
29  
30  
31  
32  
33  
34  
35  
36  
37  
38  
39  
40  
41  
42  
43  
44  
45  
46  
47  
48  
49  
50  
51  
52  
53  
54  
55  
56  
57  
58  
59  
60

| Section & Topic          | No  | Item                                                                                                                                                   | Reported on page #              |
|--------------------------|-----|--------------------------------------------------------------------------------------------------------------------------------------------------------|---------------------------------|
| <b>TITLE OR ABSTRACT</b> |     |                                                                                                                                                        |                                 |
|                          | 1   | Identification as a study of diagnostic accuracy using at least one measure of accuracy (such as sensitivity, specificity, predictive values, or AUC)  | 2                               |
| <b>ABSTRACT</b>          |     |                                                                                                                                                        |                                 |
|                          | 2   | Structured summary of study design, methods, results, and conclusions (for specific guidance, see STARD for Abstracts)                                 | 2                               |
| <b>INTRODUCTION</b>      |     |                                                                                                                                                        |                                 |
|                          | 3   | Scientific and clinical background, including the intended use and clinical role of the index test                                                     | 4                               |
|                          | 4   | Study objectives and hypotheses                                                                                                                        | 4                               |
| <b>METHODS</b>           |     |                                                                                                                                                        |                                 |
| <i>Study design</i>      | 5   | Whether data collection was planned before the index test and reference standard were performed (prospective study) or after (retrospective study)     | 4                               |
| <i>Participants</i>      | 6   | Eligibility criteria                                                                                                                                   | 4/5                             |
|                          | 7   | On what basis potentially eligible participants were identified (such as symptoms, results from previous tests, inclusion in registry)                 | 5/6                             |
|                          | 8   | Where and when potentially eligible participants were identified (setting, location and dates)                                                         | 5/6                             |
|                          | 9   | Whether participants formed a consecutive, random or convenience series                                                                                | 5/6                             |
| <i>Test methods</i>      | 10a | Index test, in sufficient detail to allow replication                                                                                                  | 4-7                             |
|                          | 10b | Reference standard, in sufficient detail to allow replication                                                                                          | 5/6                             |
|                          | 11  | Rationale for choosing the reference standard (if alternatives exist)                                                                                  | 5/6, 7                          |
|                          | 12a | Definition of and rationale for test positivity cut-offs or result categories of the index test, distinguishing pre-specified from exploratory         | 6/7                             |
|                          | 12b | Definition of and rationale for test positivity cut-offs or result categories of the reference standard, distinguishing pre-specified from exploratory | 6/7                             |
|                          | 13a | Whether clinical information and reference standard results were available to the performers/readers of the index test                                 | 6/7                             |
|                          | 13b | Whether clinical information and index test results were available to the assessors of the reference standard                                          | 6/7                             |
| <i>Analysis</i>          | 14  | Methods for estimating or comparing measures of diagnostic accuracy                                                                                    | 6/7                             |
|                          | 15  | How indeterminate index test or reference standard results were handled                                                                                | NA                              |
|                          | 16  | How missing data on the index test and reference standard were handled                                                                                 | NA                              |
|                          | 17  | Any analyses of variability in diagnostic accuracy, distinguishing pre-specified from exploratory                                                      | 6/7                             |
|                          | 18  | Intended sample size and how it was determined                                                                                                         | 5/6                             |
| <b>RESULTS</b>           |     |                                                                                                                                                        |                                 |
| <i>Participants</i>      | 19  | Flow of participants, using a diagram                                                                                                                  | NA                              |
|                          | 20  | Baseline demographic and clinical characteristics of participants                                                                                      | 8, +Appendix.                   |
|                          | 21a | Distribution of severity of disease in those with the target condition                                                                                 | 8                               |
|                          | 21b | Distribution of alternative diagnoses in those without the target condition                                                                            | Appendix, previousl. published. |
|                          | 22  | Time interval and any clinical interventions between index test and reference standard                                                                 | NA                              |
| <i>Test results</i>      | 23  | Cross tabulation of the index test results (or their distribution) by the results of the reference standard                                            | Appendix                        |
|                          | 24  | Estimates of diagnostic accuracy and their precision (such as 95% confidence intervals)                                                                | 8/9                             |
|                          | 25  | Any adverse events from performing the index test or the reference standard                                                                            | NA                              |
| <b>DISCUSSION</b>        |     |                                                                                                                                                        |                                 |
|                          | 26  | Study limitations, including sources of potential bias, statistical uncertainty, and generalisability                                                  | 12                              |
|                          | 27  | Implications for practice, including the intended use and clinical role of the index test                                                              | 3; 11,12,13                     |
| <b>OTHER INFORMATION</b> |     |                                                                                                                                                        |                                 |
|                          | 28  | Registration number and name of registry                                                                                                               | NA (IRB-Prot., 12)              |
|                          | 29  | Where the full study protocol can be accessed                                                                                                          | NA                              |
|                          | 30  | Sources of funding and other support; role of funders                                                                                                  | 14                              |

# BMJ Open

**Design and validation of a clinical scale for prehospital stroke recognition, severity grading, and prediction of large vessel occlusion  
– the shortened NIH stroke scale for emergency medical services**

|                                 |                                                                                                                                                                                                                                                                                                                                                                                                                                                                                                                                                                                                                                                                                                                                                                                                                                                                                                                                                                                                                                                                                                                                                  |
|---------------------------------|--------------------------------------------------------------------------------------------------------------------------------------------------------------------------------------------------------------------------------------------------------------------------------------------------------------------------------------------------------------------------------------------------------------------------------------------------------------------------------------------------------------------------------------------------------------------------------------------------------------------------------------------------------------------------------------------------------------------------------------------------------------------------------------------------------------------------------------------------------------------------------------------------------------------------------------------------------------------------------------------------------------------------------------------------------------------------------------------------------------------------------------------------|
| Journal:                        | <i>BMJ Open</i>                                                                                                                                                                                                                                                                                                                                                                                                                                                                                                                                                                                                                                                                                                                                                                                                                                                                                                                                                                                                                                                                                                                                  |
| Manuscript ID                   | bmjopen-2017-016893.R1                                                                                                                                                                                                                                                                                                                                                                                                                                                                                                                                                                                                                                                                                                                                                                                                                                                                                                                                                                                                                                                                                                                           |
| Article Type:                   | Research                                                                                                                                                                                                                                                                                                                                                                                                                                                                                                                                                                                                                                                                                                                                                                                                                                                                                                                                                                                                                                                                                                                                         |
| Date Submitted by the Author:   | 29-May-2017                                                                                                                                                                                                                                                                                                                                                                                                                                                                                                                                                                                                                                                                                                                                                                                                                                                                                                                                                                                                                                                                                                                                      |
| Complete List of Authors:       | Purrucker, Jan; Heidelberg University Hospital, Department of Neurology<br>Härtig, Florian; Eberhard-Karls-Universität Tübingen Medizinische Fakultät, Department of Neurology & Stroke, and Hertie Institute for Clinical Brain Research<br>Richter, Hardy; Eberhard-Karls-Universität Tübingen Medizinische Fakultät, Department of Neurology & Stroke, and Hertie Institute for Clinical Brain Research<br>Engelbrecht, Andreas; Heidelberg University Hospital, Department of Neurology<br>Hartmann, Johannes; Eberhard Karls Universität Tübingen, Department of Medical Informatics<br>Auer, Jonas; Universität Stuttgart, Department of Computer Science & Software Engineering<br>Hametner, Christian; University of Heidelberg, Neurology<br>Popp, Erik; UniversitätsKlinikum Heidelberg, Department of Anesthesiology<br>Ringleb, Peter; Heidelberg University Hospital, Department of Neurology<br>Nagel, Simon; Heidelberg University Hospital, Department of Neurology<br>Poli, Sven; Eberhard-Karls-Universität Tübingen Medizinische Fakultät, Department of Neurology & Stroke, and Hertie Institute for Clinical Brain Research |
| <b>Primary Subject Heading</b>: | Neurology                                                                                                                                                                                                                                                                                                                                                                                                                                                                                                                                                                                                                                                                                                                                                                                                                                                                                                                                                                                                                                                                                                                                        |
| Secondary Subject Heading:      | Emergency medicine                                                                                                                                                                                                                                                                                                                                                                                                                                                                                                                                                                                                                                                                                                                                                                                                                                                                                                                                                                                                                                                                                                                               |
| Keywords:                       | Stroke < NEUROLOGY, ACCIDENT & EMERGENCY MEDICINE, VASCULAR MEDICINE                                                                                                                                                                                                                                                                                                                                                                                                                                                                                                                                                                                                                                                                                                                                                                                                                                                                                                                                                                                                                                                                             |
|                                 |                                                                                                                                                                                                                                                                                                                                                                                                                                                                                                                                                                                                                                                                                                                                                                                                                                                                                                                                                                                                                                                                                                                                                  |

SCHOLARONE™  
Manuscripts

1  
2  
3  
4  
5  
6  
7  
8  
9  
10  
11  
12  
13  
14  
15  
16  
17  
18  
19  
20  
21  
22  
23  
24  
25  
26  
27  
28  
29  
30  
31  
32  
33  
34  
35  
36  
37  
38  
39  
40  
41  
42  
43  
44  
45  
46  
47  
48  
49  
50  
51  
52  
53  
54  
55  
56  
57  
58  
59  
60

**Design and validation of a clinical scale for prehospital stroke  
recognition, severity grading, and prediction of large vessel occlusion  
– the shortened NIH stroke scale for emergency medical services**

**Jan C. Purrucker,<sup>1</sup> Florian Härtig,<sup>2</sup> Hardy Richter,<sup>2</sup> Andreas Engelbrecht,<sup>1</sup>  
Johannes Hartmann,<sup>3</sup> Jonas Auer,<sup>4</sup> Christian Hametner,<sup>1</sup> Erik Popp,<sup>5</sup> Peter A.  
Ringleb,<sup>1</sup> Simon Nagel<sup>1</sup> and Sven Poli<sup>2</sup>**

**Author affiliations:**

<sup>1</sup> Department of Neurology, Heidelberg University Hospital, Heidelberg, Germany

<sup>2</sup> Department of Neurology & Stroke, and Hertie Institute for Clinical Brain Research,  
Tuebingen University Hospital, Tuebingen, Germany

<sup>3</sup> Department of Medical Informatics, University of Tuebingen, Tuebingen, Germany

<sup>4</sup> Department of Computer Science & Software Engineering, University of Stuttgart,  
Stuttgart, Germany

<sup>5</sup> Department of Anesthesiology, University of Heidelberg, Heidelberg, Germany

**Corresponding author:**

Sven Poli, MD MSc; Department of Neurology & Stroke, and Hertie Institute for  
Clinical Brain Research, Tuebingen University Hospital, Tuebingen, Germany; Phone:  
+49 7071 2968300, Fax: +49 7071 2925047, E-mail: sven.poli@icloud.com

**Keywords:** Stroke severity grading, triage, large vessel occlusion, emergency medicine

**Word-Count:** Abstract: 245; Main Manuscript: 2765.

**ABSTRACT**

**Objective:** To develop a NIH Stroke Scale (NIHSS)-compatible, all-in-one scale for rapid and comprehensive prehospital stroke assessment including stroke recognition, severity grading and progression monitoring as well as prediction of large vessel occlusion (LVO).

**Methods:** Emergency medical services (EMS) personnel and stroke physicians (N = 326) rated each item of the NIHSS regarding suitability for prehospital use; best-rated items were included. Stroke recognition was evaluated retrospectively in 689 consecutive patients with acute stroke or stroke mimics, prediction of LVO in 741 consecutive ischemic stroke patients with acute vessel imaging independent of admission-NIHSS score.

**Results:** Nine of the NIHSS-items were rated as “suitable for prehospital use”. After excluding two items in order to increase specificity, the final scale (termed shortened NIHSS for EMS, sNIHSS-EMS), it consists of ‘level of consciousness’, ‘facial palsy’, ‘motor arm/leg’, ‘sensory’, ‘language’, and ‘dysarthria’. Sensitivity for stroke recognition of the sNIHSS-EMS is 91% (95% confidence interval [CI] 86–94), specificity 52% (95% CI 47–56). Receiver operating curve analysis revealed an optimal cut-off point for LVO prediction of  $\geq 6$  (sensitivity 70% [95% CI 65–76], specificity 81% [95% CI 76–84], positive predictive value 70 [95% CI 65–75], area under the curve 0.81 [95% CI 0.78–0.84]). Test characteristics were non-inferior to non-comprehensive scales.

**Conclusions:** The sNIHSS-EMS may overcome the sequential use of multiple emergency stroke scales by permitting parallel stroke recognition, severity grading, and LVO prediction. Full NIHSS-item-compatibility allows for evaluation of stroke progression starting at the prehospital phase.

### Strengths and limitations of this study

- Prehospital stroke assessment is increasingly gaining relevance in the era of endovascular interventions for large vessel occlusions. Sound triage decisions will have a major impact on patients' outcomes. As those are left entirely to EMS personnel, it is essential to equip them with an effective tool to guide prehospital triage.
- The new clinical scale (sNIHSS-EMS), developed and validated in this study, is the first scale assessed for parallel stroke recognition, severity grading, and LVO prediction. Sequential use of multiple emergency stroke scales may thus be avoided.
- A multinational survey among different emergency medical systems and professions was performed to identify items suitable for use in prehospital emergency situations.
- The sNIHSS-EMS shares full compatibility with the in-hospital gold-standard NIHSS, but remains simple and easy to use.
- The scale will be incorporated into a prehospital stroke triage algorithm in a large regional stroke network, but no prospective data are available yet, which is acknowledged as a limitation.

## INTRODUCTION

A considerable number of stroke scales for prehospital use have been published over recent years.<sup>1,2</sup> However, most of these scales only focus on single aspects of acute stroke care, i.e. either stroke recognition,<sup>1,2</sup> early prediction of outcome,<sup>3</sup> prediction of thrombolysis,<sup>4,5</sup> or severity grading and large vessel occlusion (LVO).<sup>3, 6-18</sup>

Consequently, to provide a comprehensive prehospital stroke assessment, emergency medical services (EMS) personnel must apply at least two scales. Furthermore, the majority of existing scales lack compatibility with the NIH Stroke Scale (NIHSS), the in-hospital 'gold-standard' for stroke severity grading.<sup>2</sup> This impedes the seamless evaluation of stroke progression from pre- to in-hospital care. In the era of endovascular treatment of LVO, decisions regarding direct emergency referrals to specialized comprehensive stroke centers will have a major impact on patients' outcomes.<sup>19,20</sup> As those are left entirely to EMS personnel, it is essential to equip them with an effective tool to guide prehospital triage.

We present the development and validation of a novel comprehensive stroke scale, specifically designed for prehospital use with input from EMS. Our aim was to allow for parallel stroke recognition, severity grading and – owing to full NIHSS-compatibility – progression monitoring as well as LVO prediction.

## METHODS

### International online survey

We invited non-neurologic EMS personnel (paramedics and emergency physicians) and stroke physicians from Austria, Germany, and Switzerland to rate each individual NIHSS item regarding their applicability in a prehospital emergency setting. Invitations were sent out via the German Stroke Society (DSG), the German Society for Neuro-Intensive Care and Emergency Medicine (DGNI), as well as EMS providers.

Participation was voluntary, no financial incentive was offered, and participation was



1 only allowed once. Non-neurologic EMS personnel do not use the NIHSS routinely and  
2  
3 did not receive specific NIHSS training before the survey. For each NIHSS item, we  
4  
5 created and provided a short video demonstrating in-hospital bedside assessment  
6  
7 according to the NIHSS training instructions (a screenshot is shown as Figure 1A in the  
8  
9 Appendix). Having watched the video, participants were asked to rate each NIHSS item  
10  
11 regarding its suitability for prehospital use on a 6-item scale, ranging from 0 (most  
12  
13 suitable) to 5 (most unsuitable). Ratings were automatically entered into a database  
14  
15 together with name (optional), profession, professional experience, and place of work.  
16  
17 Participation was possible from November 19<sup>th</sup> 2015, until April 15<sup>th</sup> 2016, the pre-  
18  
19 specified closing date.  
20  
21  
22  
23  
24

### 25 **Patient cohorts**

26  
27 Test characteristics of the newly designed scale were calculated with regard to  
28  
29 performance in stroke recognition and prediction of acute LVO using two distinct  
30  
31 clinical cohorts described below.  
32  
33

34 For stroke recognition, we used a prospectively collected cohort of consecutive patients  
35  
36 with acute ischemic or hemorrhagic stroke and stroke mimics, which had already served  
37  
38 as a validation cohort in a previous comparison of existing stroke scales.<sup>2</sup> In summary,  
39  
40 the database consists of pseudonymized data of consecutive patients (including  
41  
42 comatose) with preclinical ‘suspected acute CNS disorder’ admitted to the Emergency  
43  
44 Room of the Department of Neurology, Heidelberg University Hospital, Germany by  
45  
46 EMS between November 2007 and August 2010. For all patients, a full-length NIHSS  
47  
48 score assessed by certified raters was available at admission. The diagnostic reference  
49  
50 standard was the diagnosis at hospital discharge. Cases were dichotomized (by the  
51  
52 authors AE and CH) in stroke and non-stroke, i.e. stroke-mimics. AE and CH were  
53  
54 blinded for the admission NIHSS and sNIHSS-EMS scores.  
55  
56  
57  
58  
59  
60

1 Test characteristics regarding the prediction of LVO were calculated in a prospectively  
2 collected second cohort consisting of consecutive patients with acute ischemic stroke,  
3 admitted to the Department of Neurology, Tuebingen University Hospital, Germany  
4 between January 2013 and July 2015. In accordance with local standard operating  
5 procedures, all received acute vessel imaging on admission independent of stroke  
6 severity. Neuroradiological reports and original images were reviewed by the authors  
7 HR and SP for presence of acute LVO. HR and SP were blinded to patients' NIHSS  
8 scores. Cases were considered as LVO-positive if an acute symptomatic occlusion was  
9 present in one of the following arteries: common carotid artery (CCA), internal carotid  
10 artery (ICA), carotid T, middle cerebral artery (MCA, including M1/M2 segments),  
11 anterior cerebral artery (ACA), basilar artery (BA), or posterior cerebral artery (PCA).  
12  
13  
14  
15  
16  
17  
18  
19  
20  
21  
22  
23  
24  
25  
26  
27

## 28 **Statistics**

29 To determine suitable items for use in the prehospital phase, we analyzed the online  
30 survey response data set; median and interquartile ranges (IQR) were calculated.  
31  
32 NIHSS-items receiving median scores of 0 and 1 were – as predefined – regarded  
33 eligible for further consideration. Rating differences between the professional groups  
34 (i.e. non-neurologic EMS personnel and stroke physicians) were determined using the  
35 Mann-Whitney-U test. For the calculation of test performance regarding stroke  
36 recognition, the sNIHSS-EMS score was dichotomized as indicative of stroke (score  $\geq$   
37 1), or not (score = 0). Sensitivity (the proportion of stroke patients who had a positive  
38 test, i.e. indicative of stroke) and specificity (the proportion of non-stroke patients who  
39 had a negative test), positive predictive value (PPV), and negative predictive value  
40 (NPV) were calculated with 95% confidence intervals (CI). Details of the sample size  
41 calculation are described in the extended methods in the Appendix. To determine the  
42 predictive power for LVO detection, we calculated sensitivity, specificity, PPV, and  
43 NPV, with 95% CI for each scale score ranging from 0 to 29 for the sNIHSS-EMS, and  
44  
45  
46  
47  
48  
49  
50  
51  
52  
53  
54  
55  
56  
57  
58  
59  
60

1 from 0 to 42 for the original NIHSS. Accuracy is reported additionally. Receiver  
2 operating curve (ROC) analysis was performed, area under the curve (AUC) and  
3 Youden's index were calculated. For comparison of the sNIHSS-EMS with existing  
4  
5 dedicated LVO prediction scales,<sup>7, 10-12, 14, 15</sup> we calculated the corresponding scores  
6  
7 using the NIHSS-equivalents and cut-offs as stated in the original publications.  
8  
9  
10 Statistical comparison of AUCs was performed according to DeLong et al.<sup>21</sup> Calculation  
11  
12 of the Los Angeles Motor Scale (LAMS) for our LVO cohort was not possible since the  
13  
14 item "grip-strength" was not routinely documented. P values were 2-sided with values  
15  
16 less than .05 considered statistically significant. SPSS (V23.0.0.2, IBM, New York,  
17  
18 USA), MedCalc (V16.8.4, Ostend, Belgium) and GraphPad Prism (V6.0b, San Diego,  
19  
20 California, USA) were used for data handling and analysis, and graphic presentation.  
21  
22  
23 This study was performed in accordance with the STARD guidelines for studies on  
24  
25  
26  
27  
28  
29  
30  
31  
32  
33  
34  
35  
36  
37  
38  
39  
40  
41  
42  
43  
44  
45  
46  
47  
48  
49  
50  
51  
52  
53  
54  
55  
56  
57  
58  
59  
60

## RESULTS

### Scale development

326 (13%) of 2562 recipients responded to our international online survey (Austria, Germany, and Switzerland), with the majority (57%) representing non-neurologic EMS personnel (33% paramedics and 24% prehospital emergency physicians); 33% stroke physicians, and 10% not specified. Participants reported a high level of professional experience (>10 years, 45%; <5 years, 20%).

Nine of the NIHSS-items received a median score of 0 or 1 (equivalent to most suitable and suitable for prehospital use), whereas the items 'best gaze', 'visual', 'limb ataxia', and 'extinction' were rated as less suitable and thus removed from further analyses (Table 1A in the Appendix). Although rating by stroke physicians was more rigorous, item selection based on median ratings of 0 or 1 was not shifted by the professional vote (Table 1A).

We decided to exclude items 1b (LOC questions) and 1c (LOC commands). Despite being easily assessable and thus rated suitable for prehospital use, these two items are either present in the absence of stroke as frequent features of non-stroke conditions (e.g. dementia, infection or dehydration)<sup>22</sup> or heavily influenced by aphasia<sup>23</sup> and thus redundant for stroke recognition. The new 7-items scale was termed 'shortened NIHSS for emergency medical services' (sNIHSS-EMS; Table 2).

### Stroke recognition and severity grading

In our stroke recognition validation cohort of 689 consecutive patients with 'suspected acute CNS disorder', 29% received 'stroke' as discharge diagnosis. Patients with ischemic stroke (n=200) had an admission-NIHSS of 9 (IQR 4–17), patients with hemorrhagic stroke (n=55) of 17 (IQR 5–35). Non-stroke patients (n = 489) had a median admission-NIHSS of 1 (IQR 0–6). The sNIHSS-EMS was found to have 90.5% (95% CI 85.6–94.2) sensitivity and 51.5% (95% CI 47.0–56.1) specificity for stroke

1 recognition (PPV 43.3% [95% CI 38.5–48.2], NPV 93.0% [95% CI 89.3–95.6]). Cross  
2  
3 tabulations are shown in Table 3A in the Appendix. Excluding comatose patients (n =  
4  
5 49), sensitivity was 89.1% (95% CI 83.6–93.3) and specificity 54.2% (95% CI 49.5–  
6  
7 58.8).  
8

### 11 **LVO prediction**

12  
13  
14 In the distinct LVO validation cohort of consecutive 741 ischemic stroke patients with  
15  
16 acute vessel imaging independent of their admission-NIHSS score (86.9% CTA; see  
17  
18 Table A2 for patient characteristics), a ROC analysis of the sNIHSS-EMS regarding  
19  
20 LVO prediction revealed a maximal Youden index at the cut-point of  $\geq 6$  (sensitivity  
21  
22 70.3% [95% CI 64.7–75.5], specificity 80.7% [95% CI 76.8–84.3]; Figure 1, Table 2).  
23  
24 For comparison, in the original NIHSS, the maximal Youden index was calculated for a  
25  
26 cut-point of  $\geq 9$  (Table 2). Combined re-inclusion of the NIHSS items ‘visual’, ‘gaze’  
27  
28 and ‘extinction’ improved test characteristics (AUC 0.826 vs. 0.808,  $p < 0.001$ ). Re-  
29  
30 inclusion of singular items did not improve test characteristics. Exclusion of patients  
31  
32 with coma (n=5) did not change the optimal cut-off and test characteristics (sensitivity  
33  
34 70.0% [64.4–75.3], specificity 81.1% [77.1–84.6]).  
35  
36  
37

38 We validated the sNIHSS-EMS against existing LVO prediction scales through  
39  
40 applying them to our cohort and calculation of ROC and Youden indices (Table 3,  
41  
42 Figure 1). No statistically significant differences compared to existing scales were  
43  
44 found, except for the full-length NIHSS, and the sNIHSS-8. Notably, due to  
45  
46 characteristics of our cohort, external validation based on maximal Youden indices led  
47  
48 to cut-points different from those reported in the respective original publications  
49  
50 (Table 3).  
51  
52  
53  
54

### 56 **DISCUSSION**

1 The sNIHSS-EMS is the first comprehensive stroke scale assessed for parallel stroke  
2 recognition, severity grading, and LVO prediction. Test characteristics regarding  
3 identification of patients with large vessel occlusion are non-inferior to existing LVO  
4 prediction scales. Furthermore, compatibility with the item assessment in the full-length  
5 NIHSS allows for continuous evaluation of the clinical course from pre- to in-hospital  
6 care. It may thus represent the ideal stroke scale for routine use in pre-hospital  
7 emergency medical care.

8  
9  
10  
11  
12  
13  
14  
15  
16 As previously shown by our work-group,<sup>2</sup> some of the available stroke severity scales<sup>3, 6</sup>  
17 may be used for stroke recognition with similar sensitivity and specificity when  
18 compared to scales developed for stroke recognition alone. Existing scales, however,  
19 either include items requiring complex assessment (such as extinction<sup>11, 15</sup>) or exclude  
20 items highly relevant for evaluation of stroke progression (such as level of  
21 consciousness, arm or leg motor function<sup>3, 7, 11</sup>).

22  
23  
24  
25  
26  
27  
28  
29  
30 Sensitivity of the sNIHSS-EMS regarding stroke recognition (91%) was superior to  
31 previously published results for the simpler CPSS (85%) and FAST (87%) evaluated in  
32 the same cohort of patients.<sup>2</sup> In contrast, specificity (52%) was lower compared to the  
33 CPSS (65%) and FAST (64%).<sup>2</sup> As the overall burden of a missed stroke outweighs the  
34 potentially increased workload of emergency departments, higher sensitivity may be  
35 considered more relevant. Simpler stroke scales may provide a slightly faster initial  
36 assessment, but subsequently require the use of at least one additional scale to  
37 determine stroke severity or predict LVO. The use of multiple scales, however, may be  
38 error-prone and complicates communication with receiving hospitals.

39  
40  
41  
42  
43  
44  
45  
46  
47  
48  
49 According to recent European and American recommendations, clinical screening tools  
50 may be considered in order to facilitate direct transport of patients with suspected LVO  
51 to Comprehensive Stroke Centers (CSC) with endovascular facility.<sup>20, 24</sup> For LVO  
52 prediction, our analysis revealed a maximum Youden index for the cut-point of  $\geq 6$  for  
53 the sNIHSS-EMS and, in accordance with previous findings, 9 for the original  
54  
55  
56  
57  
58  
59  
60

1 NIHSS.<sup>25</sup> Importantly, to adjust for hospital capacities and local stroke network  
2 requirements, this threshold can be adapted: higher cut-points result in an increased  
3 specificity (Table 2) leading to reduced numbers of patients bypassing Acute Stroke  
4 Ready Hospitals (ASRH) or Primary Stroke Centers (PSC) without endovascular  
5 facility.  
6  
7  
8  
9

10 The NIHSS items 'visual', 'gaze' and 'extinction' are part of some dedicated LVO  
11 prediction scales,<sup>10, 11, 14, 15</sup> but were not included in the sNIHSS-EMS due to  
12 unfavorable ratings regarding prehospital assessability. Re-inclusion of each separate  
13 item did not result in the presumed higher predictive value for LVO detection. Only  
14 combined re-inclusion of all three rejected items led to marginally enhanced test  
15 characteristics, but would result in a significantly increased number of complex-to-  
16 assess items and thus an inconvenient scale.  
17  
18  
19  
20

21 For comparison with existing scales, we externally validated dedicated LVO prediction  
22 scales in our cohort by using the cut-points as provided in the original publications and  
23 found the sNIHSS-EMS to offer comparable sensitivity and specificity (Table 4). Better  
24 test characteristics reported in the original publications for some scales may be due to  
25 differences in the definition of LVO (e.g. the 3I-SS focused on carotid T and M1  
26 occlusions only,<sup>10</sup> while the LAMS also included M3/4 occlusions<sup>16</sup>). The sNIHSS-8,  
27 which had a higher AUC in the ROC analysis than the sNIHSS-EMS, was not  
28 developed for LVO prediction and includes items rejected by EMS personnel in our  
29 survey due to the complexity of correct assessment.  
30  
31  
32  
33  
34  
35  
36  
37  
38  
39  
40  
41  
42  
43  
44  
45  
46

47 LVO prediction by clinical scales has recently been criticized due to the high false-  
48 negative rate compared to vessel imaging.<sup>17, 26</sup> The sNIHSS-EMS is not intended to  
49 substitute in-hospital acute vessel imaging,<sup>17</sup> and prehospital acute vessel imaging is  
50 still an exception.<sup>27</sup> Currently, mainly due to the narrow time window for effective  
51 intravenous thrombolysis, patients are transferred to the closest stroke center regardless  
52 of LVO suspicion. In the era of interventional thrombectomy however, ASRH or PSC  
53  
54  
55  
56  
57  
58  
59  
60

1 may have to be bypassed in favor of CSC with endovascular facility in sensibly selected  
2 cases.  
3

4  
5 Based on clinical criteria alone, the sNIHSS-EMS identifies the majority of patients  
6 with acute LVO, i.e. those patients who might benefit from a direct transfer to CSC with  
7 endovascular facility. In addition, the minority of LVO patients not bypassed to  
8 endovascular ready CSC (i.e. total score < 6 despite LVO) are not lost to endovascular  
9 therapy since secondary transportation to an endovascular ready CSC is still possible.  
10

11  
12 The sNIHSS-EMS is designed to permit the monitoring of stroke progression from pre-  
13 to in-hospital care on the item-level, a feature that has been neglected in other scales.  
14

15  
16 Clinical implications include the earlier recognition of symptom fluctuation with  
17 consequences e.g. for blood pressure management or selection of imaging modality. In  
18 practice, if a '2' is scored for 'Motor Leg left' on the sNIHSS-EMS, a '4' on the same  
19 item during routine NIHSS evaluation in the ER points to early clinical deterioration.  
20

21  
22 Clinical scores using merged items (e.g. 'hemiparesis'<sup>10</sup> or 'language/dysarthria'<sup>4</sup>) or  
23 modified item scoring (e.g. motor function scoring from 0 to 2 instead of 0 to 4<sup>11, 12, 14-</sup>  
24  
25  
26  
27  
28  
29  
30  
31  
32  
33  
34  
35  
36  
37  
38  
39  
40  
41  
42  
43  
44  
45  
46  
47  
48  
49  
50  
51  
52  
53  
54  
55  
56  
57  
58  
59  
60  
16) impede seamless monitoring of symptom progression.

Despite the positive aspects of the sNIHSS-EMS, some limitations of the present study  
require further discussion. Test characteristics regarding LVO prediction were  
calculated in a cohort of patients with confirmed ischemic stroke because determination  
of the 'true' LVO prediction threshold is only possible in a cohort without stroke  
mimics or hemorrhagic stroke. However, although this approach is in concordance with  
methods used in the past in the design of dedicated LVO prediction scales,<sup>12, 14, 16</sup> future  
prospective validation in the prehospital target population will be necessary to  
determine prevalence-dependent test characteristics. We were not able to assess LVO  
prediction of the LAMS because the item 'grip strength' is not part of the NIHSS and  
thus, was not routinely documented in our cohort. According to a retrospective  
validation study in anterior circulation stroke, the sensitivity of the LAMS for LVO



1 prediction was reported as 81% (at a threshold of 4).<sup>16</sup> As patients with stroke mimics  
2  
3 (and thus no LVO) exhibit low NIHSS scores, inclusion of these cases into the analyses,  
4  
5 would lead to an increased specificity of our cut-points. The sNIHSS-EMS is not able to  
6  
7 differentiate between ischemic and hemorrhagic stroke. This might not be a  
8  
9 disadvantage as severely affected hemorrhagic stroke patients benefit from direct  
10  
11 admission to a CSC with neurological intensive care capacity.<sup>28</sup> Despite involvement of  
12  
13 EMS systems from three European countries, generalizability to further EMS systems  
14  
15 around the world cannot be concluded. The low response-rate of our online survey  
16  
17 makes a non-response bias likely. Due to the participants' high professional experience,  
18  
19 one might have expected a shift of the suitability assessment towards more complex  
20  
21 items. However, this was not observed. As a strength of this study, LVO was evaluated  
22  
23 by CTA or MRA, and not with less accurate duplex sonography as done in previous  
24  
25 studies evaluating LVO prediction scales.<sup>11, 16</sup> The sNIHSS-EMS was primarily  
26  
27 designed to fulfill requirements for prehospital use. Although kept simple, additional  
28  
29 training on the new scale is recommended. Moreover, the sNIHSS-EMS may also serve  
30  
31 in telemedicine with usually non-neurologic physicians performing the initial patient  
32  
33 examination.  
34  
35  
36  
37  
38  
39  
40

## 41 **CONCLUSION**

42  
43 The sNIHSS-EMS may overcome the need for sequential use of multiple emergency  
44  
45 stroke scales by enabling parallel stroke recognition, severity grading, and LVO  
46  
47 prediction. Full NIHSS-item-compatibility permits evaluation of stroke progression  
48  
49 starting from the prehospital phase. Offering comparable test characteristics as  
50  
51 dedicated scales, the sNIHSS-EMS may be a promising tool for rapid and  
52  
53 comprehensive prehospital stroke assessment and triage.  
54  
55  
56  
57  
58  
59  
60

## Acknowledgments

We thank all survey participants for their contribution. Those who gave consent to the publication of their names are listed in the Appendix. We thank Louise Alice Härtig for language revision of the manuscript.

## Ethical approval

Ethical approvals were obtained from the ethics committee of the Medical Faculty Heidelberg and the ethics committee at the University Hospital Tuebingen, Germany (protocol-numbers S-109/2013 and 648/2015BO2, respectively). Written informed consent was waived.

## Funding

This study was investigator initiated, without funding.

## Contributorship

SP and JCP conceived and designed the study. EP provided the EMS data. HR and SP created and validated the LVO prediction database. SP, JCP, AE and CH collected and analyzed the data. JH and JA developed and maintained the online survey. JCP, FH, SP drafted the article. JCP, HR, FH, CH, PAR, SN, SP revised the manuscript.

## Guarantor

SP and JCP take the responsibility for the paper as a whole.

## Declaration of Conflicting Interests

Personal fees, travel support, speaker honoraria, or research grants were received from Bayer Healthcare (FH, HR, PR, SN, SP), BeneChill (SP), BMS Pfizer (PR, SP), Boehringer-Ingelheim (JCP, PR, SN, SP), Brainomix Ltd. (SN), Covidien (SP), C.R.

1 Bard (SP), EMCOOLS (SP), Helena Laboratories (FH, SP), HVM Medical (SP),  
2  
3 Medtronic (SN), Pfizer (JCP, SN), Raumedic (SP), ZOLL (SP), The other authors  
4  
5 report no conflicts of interest.  
6  
7  
8  
9

10 **Provenance and peer review:** Not commissioned; externally peer reviewed.

11  
12 **Data sharing statement:** No additional data are available.  
13  
14  
15  
16  
17  
18  
19  
20  
21  
22  
23  
24  
25  
26  
27  
28  
29  
30  
31  
32  
33  
34  
35  
36  
37  
38  
39  
40  
41  
42  
43  
44  
45  
46  
47  
48  
49  
50  
51  
52  
53  
54  
55  
56  
57  
58  
59  
60

For peer review only

## References

1. Brandler ES, Sharma M, Sinert RH, *et al.* Prehospital stroke scales in urban environments: a systematic review. *Neurology* 2014;82:2241-9.
2. Purruicker JC, Hametner C, Engelbrecht A, *et al.* Comparison of stroke recognition and stroke severity scores for stroke detection in a single cohort. *J Neurol Neurosurg Psychiatry* 2015;86:1021-8.
3. Tirschwell DL, Longstreth WT, Jr., Becker KJ, *et al.* Shortening the NIH Stroke scale for use in the prehospital setting. *Stroke* 2002;33:2801-6.
4. Iguchi Y, Kimura K, Watanabe M, *et al.* Utility of the Kurashiki Prehospital Stroke Scale for hyperacute stroke. *Cerebrovasc Dis* 2011;31:51-6.
5. Hasegawa Y, Sasaki N, Yamada K, *et al.* Prediction of thrombolytic therapy after stroke-bypass transportation: the Maria Prehospital Stroke Scale score. *J Stroke Cerebrovasc Dis* 2013;22:514-9.
6. Kimura K, Inoue T, Iguchi Y, *et al.* Kurashiki prehospital stroke scale. *Cerebrovasc Dis* 2008;25:189-91.
7. Llanes JN, Kidwell CS, Starkman S, *et al.* The Los Angeles Motor Scale (LAMS): a new measure to characterize stroke severity in the field. *Prehosp Emerg Care* 2004;8:46-50.
8. Meyer BC, Hemmen TM, Jackson CM, *et al.* Modified National Institutes of Health Stroke Scale for use in stroke clinical trials: prospective reliability and validity. *Stroke* 2002;33:1261-6.
9. Whelley-Wilson CM, Newman GC. A stroke scale for emergency triage. *J Stroke Cerebrovasc Dis* 2004;13:247-53.

- 1  
2  
3  
4  
5  
6  
7  
8  
9  
10  
11  
12  
13  
14  
15  
16  
17  
18  
19  
20  
21  
22  
23  
24  
25  
26  
27  
28  
29  
30  
31  
32  
33  
34  
35  
36  
37  
38  
39  
40  
41  
42  
43  
44  
45  
46  
47  
48  
49  
50  
51  
52  
53  
54  
55  
56  
57  
58  
59  
60
10. Singer OC, Dvorak F, du Mesnil de Rochemont R, *et al.* A simple 3-item stroke scale: comparison with the National Institutes of Health Stroke Scale and prediction of middle cerebral artery occlusion. *Stroke* 2005;36:773-6.
  11. Perez de la Ossa N, Carrera D, Gorchs M, *et al.* Design and validation of a prehospital stroke scale to predict large arterial occlusion: the rapid arterial occlusion evaluation scale. *Stroke* 2014;45:87-91.
  12. Katz BS, McMullan JT, Sucharew H, *et al.* Design and validation of a prehospital scale to predict stroke severity: Cincinnati Prehospital Stroke Severity Scale. *Stroke* 2015;46:1508-12.
  13. Teleb MS, Ver Hage A, Carter J, *et al.* Stroke vision, aphasia, neglect (VAN) assessment-a novel emergent large vessel occlusion screening tool: pilot study and comparison with current clinical severity indices. *J Neurointerv Surg* 2017;9:122-6.
  14. Hastrup S, Damgaard D, Johnsen SP, *et al.* Prehospital Acute Stroke Severity Scale to Predict Large Artery Occlusion: Design and Comparison With Other Scales. *Stroke* 2016;47:1772-6.
  15. Lima FO, Silva GS, Furie KL, *et al.* Field Assessment Stroke Triage for Emergency Destination: A Simple and Accurate Prehospital Scale to Detect Large Vessel Occlusion Strokes. *Stroke* 2016;47:1997-2002.
  16. Nazliel B, Starkman S, Liebeskind DS, *et al.* A brief prehospital stroke severity scale identifies ischemic stroke patients harboring persisting large arterial occlusions. *Stroke* 2008;39:2264-7.
  17. Heldner MR, Hsieh K, Broeg-Morvay A, *et al.* Clinical prediction of large vessel occlusion in anterior circulation stroke: mission impossible? *J Neurol* 2016;263:1633-40.
  18. Vanacker P, Heldner MR, Amiguet M, *et al.* Prediction of Large Vessel Occlusions in Acute Stroke: National Institute of Health Stroke Scale Is Hard to Beat. *Crit Care Med* 2016;44:e336-43.

- 1  
2  
3  
4  
5  
6  
7  
8  
9  
10  
11  
12  
13  
14  
15  
16  
17  
18  
19  
20  
21  
22  
23  
24  
25  
26  
27  
28  
29  
30  
31  
32  
33  
34  
35  
36  
37  
38  
39  
40  
41  
42  
43  
44  
45  
46  
47  
48  
49  
50  
51  
52  
53  
54  
55  
56  
57  
58  
59  
60
19. Rinaldo L, Brinjikji W, McCutcheon BA, *et al.* Hospital transfer associated with increased mortality after endovascular revascularization for acute ischemic stroke. *J Neurointerv Surg* 2016.
20. Pride GL, Fraser JF, Gupta R, *et al.* Prehospital care delivery and triage of stroke with emergent large vessel occlusion (ELVO): report of the Standards and Guidelines Committee of the Society of Neurointerventional Surgery. *J Neurointerv Surg* 2016.
21. DeLong ER, DeLong DM, Clarke-Pearson DL. Comparing the areas under two or more correlated receiver operating characteristic curves: a nonparametric approach. *Biometrics* 1988;44:837-45.
22. Nor AM, Davis J, Sen B, *et al.* The Recognition of Stroke in the Emergency Room (ROSIER) scale: development and validation of a stroke recognition instrument. *Lancet Neurol* 2005;4:727-34.
23. Majerus S, Bruno MA, Schnakers C, *et al.* The problem of aphasia in the assessment of consciousness in brain-damaged patients. *Prog Brain Res* 2009;177:49-61.
24. Fiehler J, Cognard C, Gallitelli M, *et al.* European Recommendations on Organisation of Interventional Care in Acute Stroke (EROICAS). *Int J Stroke* 2016;11:701-16.
25. Heldner MR, Zubler C, Mattle HP, *et al.* National Institutes of Health stroke scale score and vessel occlusion in 2152 patients with acute ischemic stroke. *Stroke* 2013;44:1153-7.
26. Turc G, Maier B, Naggara O, *et al.* Clinical Scales Do Not Reliably Identify Acute Ischemic Stroke Patients With Large-Artery Occlusion. *Stroke* 2016;47:1466-72.
27. John S, Stock S, Masaryk T, *et al.* Performance of CT Angiography on a Mobile Stroke Treatment Unit: Implications for Triage. *J Neuroimaging* 2016;26:391-4.

1  
2  
3  
4  
5  
6  
7  
8  
9  
10  
11  
12  
13  
14  
15  
16  
17  
18  
19  
20  
21  
22  
23  
24  
25  
26  
27  
28  
29  
30  
31  
32  
33  
34  
35  
36  
37  
38  
39  
40  
41  
42  
43  
44  
45  
46  
47  
48  
49  
50  
51  
52  
53  
54  
55  
56  
57  
58  
59  
60

28. Diringer MN, Edwards DF. Admission to a neurologic/neurosurgical intensive care unit is associated with reduced mortality rate after intracerebral hemorrhage. *Crit Care Med* 2001;29:635-40.

For peer review only

**Table 1** The shortened NIH Stroke Scale for Emergency Medical Services  
(sNIHSS-EMS).

| No.        | sNIHSS-EMS item        | Equivalent to the<br>NIHSS-item | Range      |
|------------|------------------------|---------------------------------|------------|
| 1          | Level of Consciousness | 1a                              | 0 – 3      |
| 2          | Facial Palsy           | 4                               | 0 – 3      |
| 3a         | Motor Arm (left)       | 5                               | 0 – 4 / UN |
| 3b         | Motor Arm (right)      | 5                               | 0 – 4 / UN |
| 4a         | Motor Leg (left)       | 6                               | 0 – 4 / UN |
| 4b         | Motor Leg (right)      | 6                               | 0 – 4 / UN |
| 5          | Sensory                | 8                               | 0 – 2      |
| 6          | Best Language          | 9                               | 0 – 3      |
| 7          | Dysarthria             | 10                              | 0 – 2 / UN |
| <b>Sum</b> |                        | –                               | 0 – 29     |

Range indicates possible scores;

Abbreviations: UN = untestable (motor items: amputation or joint fusion, dysarthria: intubation or other physical barrier).



**Table 2** Cut-off points for prediction of acute large vessel occlusion.

| Cut-off Point | Sensitivity        | Specificity        | Positive Predictive Value | Negative Predictive Value | Accuracy | <i>J</i> |
|---------------|--------------------|--------------------|---------------------------|---------------------------|----------|----------|
| sNIHSS-       |                    |                    |                           |                           |          |          |
| EMS           |                    |                    |                           |                           |          |          |
| 5             | 74.8 (69.4 – 79.7) | 73.4 (69.1 – 77.4) | 66.4 (59.0 – 69.5)        | 81.9 (77.8 – 85.6)        | 74.0     | 0.482    |
| 6*            | 70.3 (64.7 – 75.5) | 80.7 (76.8 – 84.3) | 70.1 (64.5 – 75.3)        | 80.9 (76.9 – 84.4)        | 76.7     | 0.511    |
| 7             | 65.2 (59.4 – 70.6) | 85.8 (82.2 – 88.9) | 74.7 (68.9 – 79.9)        | 79.3 (75.4 – 82.8)        | 77.7     | 0.510    |
| NIHSS         |                    |                    |                           |                           |          |          |
| 8             | 72.4 (66.9 – 77.5) | 80.7 (76.8 – 84.3) | 70.7 (65.2 – 75.8)        | 82.0 (78.1 – 85.4)        | 77.5     | 0.531    |
| 9*            | 69.3 (63.7 – 74.6) | 85.4 (81.8 – 88.5) | 75.3 (69.7 – 80.3)        | 81.2 (77.4 – 84.6)        | 79.1     | 0.547    |
| 10            | 65.9 (60.1 – 71.3) | 88.0 (84.7 – 90.9) | 78.0 (72.2 – 83.0)        | 80.0 (76.2 – 83.5)        | 79.4     | 0.539    |

Abbreviations: NIHSS = NIH Stroke Scale; sNIHSS-EMS, shortened NIHSS for emergency medical services.

Data are % (95% CI). *J* indicates Youden's-Index, \* indicates the optimal cut-off according to the Youden index.

**Table 3** Comparison of clinical scales for prehospital prediction of large vessel occlusions

|                                                                     | 3I-SS | LAMS | RACE | CPSSS | FAST-<br>ED | PASS | sNIHSS-<br>EMS |
|---------------------------------------------------------------------|-------|------|------|-------|-------------|------|----------------|
| Reference                                                           | 10    | 16   | 11   | 12    | 15          | 14   | —              |
| Scale characteristics                                               |       |      |      |       |             |      |                |
| No. of items assessed                                               | 3     | 3    | 5*   | 3     | 5           | 3    | 7              |
| Score range                                                         | 0–6   | 0–5  | 0–9  | 0–4   | 0–9         | 0–3  | 0–29           |
| NIHSS compatible item assessment                                    | —     | —    | —    | —     | —           | —    | ●              |
| Stroke Recognition                                                  | —     | —    | —    | —     | —           | —    | ●              |
| Stroke severity grading                                             | —     | (●)  | (●)  | —     | —           | —    | ●              |
| Large vessel occlusion prediction                                   | ●     | ●    | ●    | ●     | ●           | ●    | ●              |
| LVO prediction, test characteristics, own cohort (N = 741, 44% LVO) |       |      |      |       |             |      |                |
| Cut-point used †                                                    | ≥ 4   | ≥ 4  | ≥ 5  | ≥ 2   | ≥ 4         | ≥ 2  | ≥ 6            |
| Sensitivity                                                         | 40%   | —‡   | 59%  | 59%   | 60%         | 68%  | 70%            |

|   |             |     |    |     |     |     |     |     |
|---|-------------|-----|----|-----|-----|-----|-----|-----|
| 1 | Specificity | 95% | -‡ | 91% | 89% | 90% | 84% | 81% |
| 2 |             |     |    |     |     |     |     |     |
| 3 | PPV         | 85% | -‡ | 81% | 77% | 80% | 74% | 70% |
| 4 |             |     |    |     |     |     |     |     |
| 5 | NPV         | 71% | -‡ | 78% | 77% | 78% | 81% | 81% |
| 6 |             |     |    |     |     |     |     |     |

LVO prediction, test characteristics, original cohorts§

|    |             |       |       |         |       |       |         |   |
|----|-------------|-------|-------|---------|-------|-------|---------|---|
| 10 | Cohort (N   | 83    | 119   | 357     | 303   | 727   | 3127    |   |
| 11 | (%LVO))     | (35%) | (62%) | (21%)** | (73%) | (33%) | (35%)†† | - |
| 12 |             |       |       |         |       |       |         |   |
| 13 | Sensitivity | 67%   | 81%   | 85%     | 83%   | 61%   | 66%     | - |
| 14 |             |       |       |         |       |       |         |   |
| 15 | Specificity | 92%   | 89%   | 68%     | 40%   | 89%   | 83%     | - |
| 16 |             |       |       |         |       |       |         |   |
| 17 | PPV         | 74%   | nd    | 42%     | nd    | 72%   | 68%     | - |
| 18 |             |       |       |         |       |       |         |   |
| 19 | NPV         | 89%   | nd    | 94%     | nd    | 82%   | 81%     | - |
| 20 |             |       |       |         |       |       |         |   |

Abbreviations: nd: no data.

\* If right sided hemiparesis, aphasia is assessed, if left sided hemiparesis, agnosia.

† Cut-points according to original publications. Based on the Youden indices calculated from our data, optimal cut-points are different: 3I-SS  $\geq 2$ , RACE  $\geq 3$ , CPSSS  $\geq 1$ , FAST-ED  $\geq 3$ .

‡ Grip-strength was not routinely documented, therefore external validation of the LAMS was not possible.

§ Definition of large vessel occlusions according to original publications (3I-SS: carotid-T or M1; LAMS: ICA, M1, M2, M3/4, ACA; RACE: terminal ICA, M1, tandem CCA/ICA+M1, BA; CPSSS: ICA, M1, tandem ICA+M2, BA; FAST-ED: ICA, M1, M2, BA; PASS: "visible clot in the anterior or posterior circulation on CTA or MRA"; abbreviations within the main text).

\*\* Including cases assessed by transcranial duplex only (N = 197).

†† Only patients who received intravenous tPA; 2/3 of entire cohort were taken as a random sample for derivation. In the remaining 1/3, sensitivity was 61%, specificity 83%.

1  
2  
3  
4  
5 **Figure 1.** Receiver operating curves for prediction of acute large vessel occlusion.  
6

7  
8 Abbreviations: AUC: area under the curve; ref.: reference.  
9  
10  
11  
12  
13  
14  
15  
16  
17  
18  
19  
20  
21  
22  
23  
24  
25  
26  
27  
28  
29  
30  
31  
32  
33  
34  
35  
36  
37  
38  
39  
40  
41  
42  
43  
44  
45  
46  
47  
48  
49  
50  
51  
52  
53  
54  
55  
56  
57  
58  
59  
60

1  
2  
3  
4  
5  
6  
7  
8  
9  
10  
11  
12  
13  
14  
15  
16  
17  
18  
19  
20  
21  
22  
23  
24  
25  
26  
27  
28  
29  
30  
31  
32  
33  
34  
35  
36  
37  
38  
39  
40  
41  
42  
43  
44  
45  
46  
47  
48  
49  
50  
51  
52  
53  
54  
55  
56  
57  
58  
59  
60

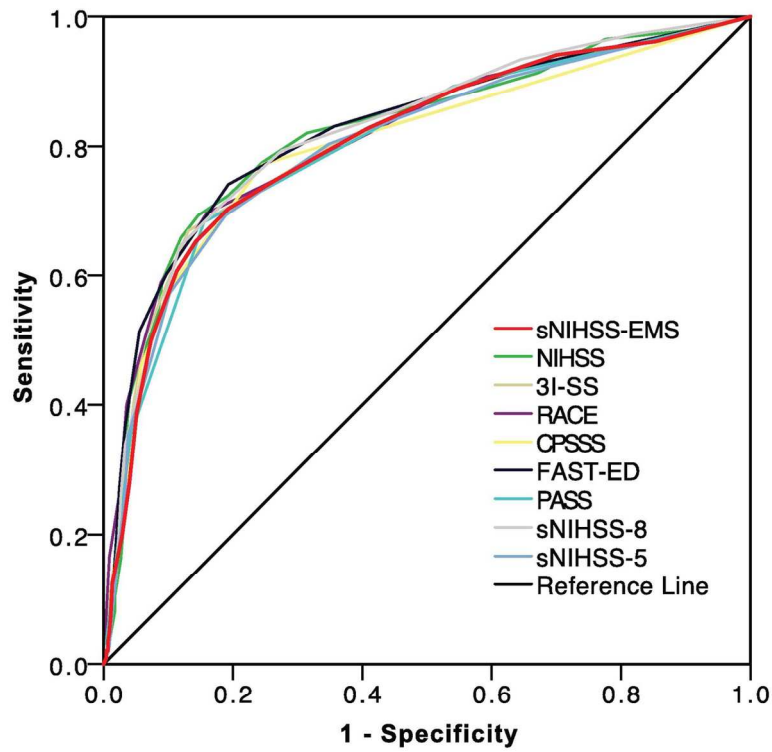

| Scale      | Area Under the Curve (95% CI) | <i>p</i>    |
|------------|-------------------------------|-------------|
| sNIHSS-EMS | 0.808 (0.775 – 0.841)         | <i>ref.</i> |
| NIHSS      | 0.821 (0.788 – 0.854)         | 0.019       |
| 3I-SS      | 0.804 (0.770 – 0.838)         | 0.697       |
| RACE       | 0.816 (0.784 – 0.849)         | 0.314       |
| CPSSS      | 0.802 (0.767 – 0.836)         | 0.605       |
| FAST-ED    | 0.825 (0.793 – 0.857)         | 0.078       |
| PASS       | 0.805 (0.771 – 0.838)         | 0.766       |
| sNIHSS-8   | 0.823 (0.791 – 0.855)         | 0.020       |
| sNIHSS-5   | 0.803 (0.769 – 0.837)         | 0.643       |

Figure 1

124x173mm (300 x 300 DPI)

| Section & Topic          | No  | Item                                                                                                                                                   | Reported on page #              |
|--------------------------|-----|--------------------------------------------------------------------------------------------------------------------------------------------------------|---------------------------------|
| <b>TITLE OR ABSTRACT</b> |     |                                                                                                                                                        |                                 |
|                          | 1   | Identification as a study of diagnostic accuracy using at least one measure of accuracy (such as sensitivity, specificity, predictive values, or AUC)  | 2                               |
| <b>ABSTRACT</b>          |     |                                                                                                                                                        |                                 |
|                          | 2   | Structured summary of study design, methods, results, and conclusions (for specific guidance, see STARD for Abstracts)                                 | 2                               |
| <b>INTRODUCTION</b>      |     |                                                                                                                                                        |                                 |
|                          | 3   | Scientific and clinical background, including the intended use and clinical role of the index test                                                     | 4                               |
|                          | 4   | Study objectives and hypotheses                                                                                                                        | 4                               |
| <b>METHODS</b>           |     |                                                                                                                                                        |                                 |
| <i>Study design</i>      | 5   | Whether data collection was planned before the index test and reference standard were performed (prospective study) or after (retrospective study)     | 4                               |
| <i>Participants</i>      | 6   | Eligibility criteria                                                                                                                                   | 4/5                             |
|                          | 7   | On what basis potentially eligible participants were identified (such as symptoms, results from previous tests, inclusion in registry)                 | 5/6                             |
|                          | 8   | Where and when potentially eligible participants were identified (setting, location and dates)                                                         | 5/6                             |
|                          | 9   | Whether participants formed a consecutive, random or convenience series                                                                                | 5/6                             |
| <i>Test methods</i>      | 10a | Index test, in sufficient detail to allow replication                                                                                                  | 4-7                             |
|                          | 10b | Reference standard, in sufficient detail to allow replication                                                                                          | 5/6                             |
|                          | 11  | Rationale for choosing the reference standard (if alternatives exist)                                                                                  | 5/6, 7                          |
|                          | 12a | Definition of and rationale for test positivity cut-offs or result categories of the index test, distinguishing pre-specified from exploratory         | 6/7                             |
|                          | 12b | Definition of and rationale for test positivity cut-offs or result categories of the reference standard, distinguishing pre-specified from exploratory | 6/7                             |
|                          | 13a | Whether clinical information and reference standard results were available to the performers/readers of the index test                                 | 6/7                             |
|                          | 13b | Whether clinical information and index test results were available to the assessors of the reference standard                                          | 6/7                             |
| <i>Analysis</i>          | 14  | Methods for estimating or comparing measures of diagnostic accuracy                                                                                    | 6/7                             |
|                          | 15  | How indeterminate index test or reference standard results were handled                                                                                | NA                              |
|                          | 16  | How missing data on the index test and reference standard were handled                                                                                 | NA                              |
|                          | 17  | Any analyses of variability in diagnostic accuracy, distinguishing pre-specified from exploratory                                                      | 6/7                             |
|                          | 18  | Intended sample size and how it was determined                                                                                                         | 6, +Appendix                    |
| <b>RESULTS</b>           |     |                                                                                                                                                        |                                 |
| <i>Participants</i>      | 19  | Flow of participants, using a diagram                                                                                                                  | NA                              |
|                          | 20  | Baseline demographic and clinical characteristics of participants                                                                                      | 8, +Appendix.                   |
|                          | 21a | Distribution of severity of disease in those with the target condition                                                                                 | 8                               |
|                          | 21b | Distribution of alternative diagnoses in those without the target condition                                                                            | Appendix, previousl. published. |
|                          | 22  | Time interval and any clinical interventions between index test and reference standard                                                                 | NA                              |
| <i>Test results</i>      | 23  | Cross tabulation of the index test results (or their distribution) by the results of the reference standard                                            | Appendix                        |
|                          | 24  | Estimates of diagnostic accuracy and their precision (such as 95% confidence intervals)                                                                | 8/9                             |
|                          | 25  | Any adverse events from performing the index test or the reference standard                                                                            | NA                              |
| <b>DISCUSSION</b>        |     |                                                                                                                                                        |                                 |
|                          | 26  | Study limitations, including sources of potential bias, statistical uncertainty, and generalisability                                                  | 12                              |
|                          | 27  | Implications for practice, including the intended use and clinical role of the index test                                                              | 3; 11,12,13                     |
| <b>OTHER INFORMATION</b> |     |                                                                                                                                                        |                                 |
|                          | 28  | Registration number and name of registry                                                                                                               | NA (IRB-Prot., 12)              |
|                          | 29  | Where the full study protocol can be accessed                                                                                                          | NA                              |
|                          | 30  | Sources of funding and other support; role of funders                                                                                                  | 14                              |

# BMJ Open

**Design and validation of a clinical scale for prehospital stroke recognition, severity grading, and prediction of large vessel occlusion  
– the shortened NIH stroke scale for emergency medical services**

|                                 |                                                                                                                                                                                                                                                                                                                                                                                                                                                                                                                                                                                                                                                                                                                                                                                                                                                                                                                                                                                                                                                                                                                                                  |
|---------------------------------|--------------------------------------------------------------------------------------------------------------------------------------------------------------------------------------------------------------------------------------------------------------------------------------------------------------------------------------------------------------------------------------------------------------------------------------------------------------------------------------------------------------------------------------------------------------------------------------------------------------------------------------------------------------------------------------------------------------------------------------------------------------------------------------------------------------------------------------------------------------------------------------------------------------------------------------------------------------------------------------------------------------------------------------------------------------------------------------------------------------------------------------------------|
| Journal:                        | <i>BMJ Open</i>                                                                                                                                                                                                                                                                                                                                                                                                                                                                                                                                                                                                                                                                                                                                                                                                                                                                                                                                                                                                                                                                                                                                  |
| Manuscript ID                   | bmjopen-2017-016893.R2                                                                                                                                                                                                                                                                                                                                                                                                                                                                                                                                                                                                                                                                                                                                                                                                                                                                                                                                                                                                                                                                                                                           |
| Article Type:                   | Research                                                                                                                                                                                                                                                                                                                                                                                                                                                                                                                                                                                                                                                                                                                                                                                                                                                                                                                                                                                                                                                                                                                                         |
| Date Submitted by the Author:   | 18-Jun-2017                                                                                                                                                                                                                                                                                                                                                                                                                                                                                                                                                                                                                                                                                                                                                                                                                                                                                                                                                                                                                                                                                                                                      |
| Complete List of Authors:       | Purrucker, Jan; Heidelberg University Hospital, Department of Neurology<br>Härtig, Florian; Eberhard-Karls-Universität Tübingen Medizinische Fakultät, Department of Neurology & Stroke, and Hertie Institute for Clinical Brain Research<br>Richter, Hardy; Eberhard-Karls-Universität Tübingen Medizinische Fakultät, Department of Neurology & Stroke, and Hertie Institute for Clinical Brain Research<br>Engelbrecht, Andreas; Heidelberg University Hospital, Department of Neurology<br>Hartmann, Johannes; Eberhard Karls Universität Tübingen, Department of Medical Informatics<br>Auer, Jonas; Universität Stuttgart, Department of Computer Science & Software Engineering<br>Hametner, Christian; University of Heidelberg, Neurology<br>Popp, Erik; UniversitätsKlinikum Heidelberg, Department of Anesthesiology<br>Ringleb, Peter; Heidelberg University Hospital, Department of Neurology<br>Nagel, Simon; Heidelberg University Hospital, Department of Neurology<br>Poli, Sven; Eberhard-Karls-Universität Tübingen Medizinische Fakultät, Department of Neurology & Stroke, and Hertie Institute for Clinical Brain Research |
| <b>Primary Subject Heading</b>: | Neurology                                                                                                                                                                                                                                                                                                                                                                                                                                                                                                                                                                                                                                                                                                                                                                                                                                                                                                                                                                                                                                                                                                                                        |
| Secondary Subject Heading:      | Emergency medicine                                                                                                                                                                                                                                                                                                                                                                                                                                                                                                                                                                                                                                                                                                                                                                                                                                                                                                                                                                                                                                                                                                                               |
| Keywords:                       | Stroke < NEUROLOGY, ACCIDENT & EMERGENCY MEDICINE, VASCULAR MEDICINE                                                                                                                                                                                                                                                                                                                                                                                                                                                                                                                                                                                                                                                                                                                                                                                                                                                                                                                                                                                                                                                                             |
|                                 |                                                                                                                                                                                                                                                                                                                                                                                                                                                                                                                                                                                                                                                                                                                                                                                                                                                                                                                                                                                                                                                                                                                                                  |

SCHOLARONE™  
Manuscripts

1  
2  
3  
4  
5  
6  
7  
8  
9  
10  
11  
12  
13  
14  
15  
16  
17  
18  
19  
20  
21  
22  
23  
24  
25  
26  
27  
28  
29  
30  
31  
32  
33  
34  
35  
36  
37  
38  
39  
40  
41  
42  
43  
44  
45  
46  
47  
48  
49  
50  
51  
52  
53  
54  
55  
56  
57  
58  
59  
60

**Design and validation of a clinical scale for prehospital stroke  
recognition, severity grading, and prediction of large vessel occlusion  
– the shortened NIH stroke scale for emergency medical services**

**Jan C. Purrucker,<sup>1</sup> Florian Härtig,<sup>2</sup> Hardy Richter,<sup>2</sup> Andreas Engelbrecht,<sup>1</sup>  
Johannes Hartmann,<sup>3</sup> Jonas Auer,<sup>4</sup> Christian Hametner,<sup>1</sup> Erik Popp,<sup>5</sup> Peter A.  
Ringleb,<sup>1</sup> Simon Nagel<sup>1</sup> and Sven Poli<sup>2</sup>**

**Author affiliations:**

<sup>1</sup> Department of Neurology, Heidelberg University Hospital, Heidelberg, Germany

<sup>2</sup> Department of Neurology & Stroke, and Hertie Institute for Clinical Brain Research,  
Tuebingen University Hospital, Tuebingen, Germany

<sup>3</sup> Department of Medical Informatics, University of Tuebingen, Tuebingen, Germany

<sup>4</sup> Department of Computer Science & Software Engineering, University of Stuttgart,  
Stuttgart, Germany

<sup>5</sup> Department of Anesthesiology, University of Heidelberg, Heidelberg, Germany

**Corresponding author:**

Sven Poli, MD MSc; Department of Neurology & Stroke, and Hertie Institute for  
Clinical Brain Research, Tuebingen University Hospital, Tuebingen, Germany; Phone:  
+49 7071 2968300, Fax: +49 7071 2925047, E-mail: sven.poli@icloud.com

**Keywords:** Stroke severity grading, triage, large vessel occlusion, emergency medicine

**Word-Count:** Abstract: 245; Main Manuscript: 2765.



**ABSTRACT**

**Objective:** To develop a NIH Stroke Scale (NIHSS)-compatible, all-in-one scale for rapid and comprehensive prehospital stroke assessment including stroke recognition, severity grading and progression monitoring as well as prediction of large vessel occlusion (LVO).

**Methods:** Emergency medical services (EMS) personnel and stroke physicians (N = 326) rated each item of the NIHSS regarding suitability for prehospital use; best-rated items were included. Stroke recognition was evaluated retrospectively in 689 consecutive patients with acute stroke or stroke mimics, prediction of LVO in 741 consecutive ischemic stroke patients with acute vessel imaging independent of admission-NIHSS score.

**Results:** Nine of the NIHSS-items were rated as “suitable for prehospital use”. After excluding two items in order to increase specificity, the final scale (termed shortened NIHSS for EMS, sNIHSS-EMS), it consists of ‘level of consciousness’, ‘facial palsy’, ‘motor arm/leg’, ‘sensory’, ‘language’, and ‘dysarthria’. Sensitivity for stroke recognition of the sNIHSS-EMS is 91% (95% confidence interval [CI] 86–94), specificity 52% (95% CI 47–56). Receiver operating curve analysis revealed an optimal cut-off point for LVO prediction of  $\geq 6$  (sensitivity 70% [95% CI 65–76], specificity 81% [95% CI 76–84], positive predictive value 70 [95% CI 65–75], area under the curve 0.81 [95% CI 0.78–0.84]). Test characteristics were non-inferior to non-comprehensive scales.

**Conclusions:** The sNIHSS-EMS may overcome the sequential use of multiple emergency stroke scales by permitting parallel stroke recognition, severity grading, and LVO prediction. Full NIHSS-item-compatibility allows for evaluation of stroke progression starting at the prehospital phase.

### Strengths and limitations of this study

- Prehospital stroke assessment is increasingly gaining relevance in the era of endovascular interventions for large vessel occlusions. Sound triage decisions will have a major impact on patients' outcomes. As those are left entirely to EMS personnel, it is essential to equip them with an effective tool to guide prehospital triage.
- The new clinical scale (sNIHSS-EMS), developed and validated in this study, is the first scale assessed for parallel stroke recognition, severity grading, and LVO prediction. Sequential use of multiple emergency stroke scales may thus be avoided.
- A multinational survey among different emergency medical systems and professions was performed to identify items suitable for use in prehospital emergency situations.
- The sNIHSS-EMS shares full compatibility with the in-hospital gold-standard NIHSS, but remains simple and easy to use.
- The scale will be incorporated into a prehospital stroke triage algorithm in a large regional stroke network, but no prospective data are available yet, which is acknowledged as a limitation.

## INTRODUCTION

A considerable number of stroke scales for prehospital use have been published over recent years.<sup>1,2</sup> However, most of these scales only focus on single aspects of acute stroke care, i.e. either stroke recognition,<sup>1,2</sup> early prediction of outcome,<sup>3</sup> prediction of thrombolysis,<sup>4,5</sup> or severity grading and large vessel occlusion (LVO).<sup>3, 6-18</sup>

Consequently, to provide a comprehensive prehospital stroke assessment, emergency medical services (EMS) personnel must apply at least two scales. Furthermore, the majority of existing scales lack compatibility with the NIH Stroke Scale (NIHSS), the in-hospital 'gold-standard' for stroke severity grading.<sup>2</sup> This impedes the seamless evaluation of stroke progression from pre- to in-hospital care. In the era of endovascular treatment of LVO, decisions regarding direct emergency referrals to specialized comprehensive stroke centers will have a major impact on patients' outcomes.<sup>19,20</sup> As those are left entirely to EMS personnel, it is essential to equip them with an effective tool to guide prehospital triage.

We present the development and validation of a novel comprehensive stroke scale, specifically designed for prehospital use with input from EMS. Our aim was to allow for parallel stroke recognition, severity grading and – owing to full NIHSS-compatibility – progression monitoring as well as LVO prediction.

## METHODS

### International online survey

We invited non-neurologic EMS personnel (paramedics and emergency physicians) and stroke physicians from Austria, Germany, and Switzerland to rate each individual NIHSS item regarding their applicability in a prehospital emergency setting. Invitations were sent out via the German Stroke Society (DSG), the German Society for Neuro-Intensive Care and Emergency Medicine (DGNI), as well as EMS providers.

Participation was voluntary, no financial incentive was offered, and participation was

1 only allowed once. Non-neurologic EMS personnel do not use the NIHSS routinely and  
2  
3 did not receive specific NIHSS training before the survey. For each NIHSS item, we  
4  
5 created and provided a short video demonstrating in-hospital bedside assessment  
6  
7 according to the NIHSS training instructions (a screenshot is shown as Figure 1A in the  
8  
9 Appendix). Having watched the video, participants were asked to rate each NIHSS item  
10  
11 regarding its suitability for prehospital use on a 6-item scale, ranging from 0 (most  
12  
13 suitable) to 5 (most unsuitable). Ratings were automatically entered into a database  
14  
15 together with name (optional), profession, professional experience, and place of work.  
16  
17 Participation was possible from November 19<sup>th</sup> 2015, until April 15<sup>th</sup> 2016, the pre-  
18  
19 specified closing date.  
20  
21  
22  
23  
24

### 25 **Patient cohorts**

26  
27 Test characteristics of the newly designed scale were calculated with regard to  
28  
29 performance in stroke recognition and prediction of acute LVO using two distinct  
30  
31 clinical cohorts described below.  
32  
33

34 For stroke recognition, we used a prospectively collected cohort of consecutive patients  
35  
36 with acute ischemic or hemorrhagic stroke and stroke mimics, which had already served  
37  
38 as a validation cohort in a previous comparison of existing stroke scales.<sup>2</sup> In summary,  
39  
40 the database consists of pseudonymized data of consecutive patients (including  
41  
42 comatose) with preclinical ‘suspected acute CNS disorder’ admitted to the Emergency  
43  
44 Room of the Department of Neurology, Heidelberg University Hospital, Germany by  
45  
46 EMS between November 2007 and August 2010. For all patients, a full-length NIHSS  
47  
48 score assessed by certified raters was available at admission. The diagnostic reference  
49  
50 standard was the diagnosis at hospital discharge. Cases were dichotomized (by the  
51  
52 authors AE and CH) in stroke and non-stroke, i.e. stroke-mimics. AE and CH were  
53  
54 blinded for the admission NIHSS and sNIHSS-EMS scores.  
55  
56  
57  
58  
59  
60

1 Test characteristics regarding the prediction of LVO were calculated in a prospectively  
2 collected second cohort consisting of consecutive patients with acute ischemic stroke,  
3 admitted to the Department of Neurology, Tuebingen University Hospital, Germany  
4 between January 2013 and July 2015. In accordance with local standard operating  
5 procedures, all received acute vessel imaging on admission independent of stroke  
6 severity. Neuroradiological reports and original images were reviewed by the authors  
7 HR and SP for presence of acute LVO. HR and SP were blinded to patients' NIHSS  
8 scores. Cases were considered as LVO-positive if an acute symptomatic occlusion was  
9 present in one of the following arteries: common carotid artery (CCA), internal carotid  
10 artery (ICA), carotid T, middle cerebral artery (MCA, including M1/M2 segments),  
11 anterior cerebral artery (ACA), basilar artery (BA), or posterior cerebral artery (PCA).  
12  
13  
14  
15  
16  
17  
18  
19  
20  
21  
22  
23  
24  
25  
26  
27

## 28 **Statistics**

29 To determine suitable items for use in the prehospital phase, we analyzed the online  
30 survey response data set; median and interquartile ranges (IQR) were calculated.  
31  
32 NIHSS-items receiving median scores of 0 and 1 were – as predefined – regarded  
33 eligible for further consideration. Rating differences between the professional groups  
34 (i.e. non-neurologic EMS personnel and stroke physicians) were determined using the  
35 Mann-Whitney-U test. For the calculation of test performance regarding stroke  
36 recognition, the sNIHSS-EMS score was dichotomized as indicative of stroke (score  $\geq$   
37 1), or not (score = 0). Sensitivity (the proportion of stroke patients who had a positive  
38 test, i.e. indicative of stroke) and specificity (the proportion of non-stroke patients who  
39 had a negative test), positive predictive value (PPV), and negative predictive value  
40 (NPV) were calculated with 95% confidence intervals (CI). Details of the sample size  
41 calculation are described in the extended methods in the Appendix. To determine the  
42 predictive power for LVO detection, we calculated sensitivity, specificity, PPV, and  
43 NPV, with 95% CI for each scale score ranging from 0 to 29 for the sNIHSS-EMS, and  
44  
45  
46  
47  
48  
49  
50  
51  
52  
53  
54  
55  
56  
57  
58  
59  
60

1 from 0 to 42 for the original NIHSS. Accuracy is reported additionally. Receiver  
2 operating curve (ROC) analysis was performed, area under the curve (AUC) and  
3 Youden's index were calculated. For comparison of the sNIHSS-EMS with existing  
4  
5 dedicated LVO prediction scales,<sup>7, 10-12, 14, 15</sup> we calculated the corresponding scores  
6  
7 using the NIHSS-equivalents and cut-offs as stated in the original publications.  
8  
9  
10 Statistical comparison of AUCs was performed according to DeLong et al.<sup>21</sup> Calculation  
11  
12 of the Los Angeles Motor Scale (LAMS) for our LVO cohort was not possible since the  
13  
14 item "grip-strength" was not routinely documented. P values were 2-sided with values  
15  
16 less than .05 considered statistically significant. SPSS (V23.0.0.2, IBM, New York,  
17  
18 USA), MedCalc (V16.8.4, Ostend, Belgium) and GraphPad Prism (V6.0b, San Diego,  
19  
20 California, USA) were used for data handling and analysis, and graphic presentation.  
21  
22  
23 This study was performed in accordance with the STARD guidelines for studies on  
24  
25 diagnostic tests.  
26  
27  
28  
29  
30  
31  
32  
33  
34  
35  
36  
37  
38  
39  
40  
41  
42  
43  
44  
45  
46  
47  
48  
49  
50  
51  
52  
53  
54  
55  
56  
57  
58  
59  
60

## RESULTS

### Scale development

326 (13%) of 2562 recipients responded to our international online survey (Austria, Germany, and Switzerland), with the majority (57%) representing non-neurologic EMS personnel (33% paramedics and 24% prehospital emergency physicians); 33% stroke physicians, and 10% not specified. Participants reported a high level of professional experience (>10 years, 45%; <5 years, 20%).

Nine of the NIHSS-items received a median score of 0 or 1 (equivalent to most suitable and suitable for prehospital use), whereas the items 'best gaze', 'visual', 'limb ataxia', and 'extinction' were rated as less suitable and thus removed from further analyses (Table 1A in the Appendix). Although rating by stroke physicians was more rigorous, item selection based on median ratings of 0 or 1 was not shifted by the professional vote (Table 1A).

We decided to exclude items 1b (LOC questions) and 1c (LOC commands). Despite being easily assessable and thus rated suitable for prehospital use, these two items are either present in the absence of stroke as frequent features of non-stroke conditions (e.g. dementia, infection or dehydration)<sup>22</sup> or heavily influenced by aphasia<sup>23</sup> and thus redundant for stroke recognition. The new 7-items scale was termed 'shortened NIHSS for emergency medical services' (sNIHSS-EMS; Table 2).

### Stroke recognition and severity grading

In our stroke recognition validation cohort of 689 consecutive patients with 'suspected acute CNS disorder', 29% received 'stroke' as discharge diagnosis. Patients with ischemic stroke (n=200) had an admission-NIHSS of 9 (IQR 4–17), patients with hemorrhagic stroke (n=55) of 17 (IQR 5–35). Non-stroke patients (n = 489) had a median admission-NIHSS of 1 (IQR 0–6). The sNIHSS-EMS was found to have 90.5% (95% CI 85.6–94.2) sensitivity and 51.5% (95% CI 47.0–56.1) specificity for stroke

1 recognition (PPV 43.3% [95% CI 38.5–48.2], NPV 93.0% [95% CI 89.3–95.6]). Cross  
2  
3 tabulations are shown in Table 3A in the Appendix. Excluding comatose patients (n =  
4  
5 49), sensitivity was 89.1% (95% CI 83.6–93.3) and specificity 54.2% (95% CI 49.5–  
6  
7 58.8).  
8

### 11 **LVO prediction**

12  
13  
14 In the distinct LVO validation cohort of consecutive 741 ischemic stroke patients with  
15  
16 acute vessel imaging independent of their admission-NIHSS score (86.9% CTA; see  
17  
18 Table A2 for patient characteristics), a ROC analysis of the sNIHSS-EMS regarding  
19  
20 LVO prediction revealed a maximal Youden index at the cut-point of  $\geq 6$  (sensitivity  
21  
22 70.3% [95% CI 64.7–75.5], specificity 80.7% [95% CI 76.8–84.3]; Figure 1, Table 2).  
23  
24 For comparison, in the original NIHSS, the maximal Youden index was calculated for a  
25  
26 cut-point of  $\geq 9$  (Table 2). Combined re-inclusion of the NIHSS items ‘visual’, ‘gaze’  
27  
28 and ‘extinction’ improved test characteristics (AUC 0.826 vs. 0.808,  $p < 0.001$ ). Re-  
29  
30 inclusion of singular items did not improve test characteristics. Exclusion of patients  
31  
32 with coma (n=5) did not change the optimal cut-off and test characteristics (sensitivity  
33  
34 70.0% [64.4–75.3], specificity 81.1% [77.1–84.6]).  
35  
36  
37

38 We validated the sNIHSS-EMS against existing LVO prediction scales through  
39  
40 applying them to our cohort and calculation of ROC and Youden indices (Table 3,  
41  
42 Figure 1). No statistically significant differences compared to existing scales were  
43  
44 found, except for the full-length NIHSS, and the sNIHSS-8. Notably, due to  
45  
46 characteristics of our cohort, external validation based on maximal Youden indices led  
47  
48 to cut-points different from those reported in the respective original publications  
49  
50 (Table 3).  
51  
52  
53  
54

### 56 **DISCUSSION**



1 The sNIHSS-EMS is the first comprehensive stroke scale assessed for parallel stroke  
2 recognition, severity grading, and LVO prediction. Test characteristics regarding  
3 identification of patients with large vessel occlusion are non-inferior to existing LVO  
4 prediction scales. Furthermore, compatibility with the item assessment in the full-length  
5 NIHSS allows for continuous evaluation of the clinical course from pre- to in-hospital  
6 care. It may thus represent the ideal stroke scale for routine use in pre-hospital  
7 emergency medical care.

8  
9  
10  
11  
12  
13  
14  
15  
16 As previously shown by our work-group,<sup>2</sup> some of the available stroke severity scales<sup>3, 6</sup>  
17 may be used for stroke recognition with similar sensitivity and specificity when  
18 compared to scales developed for stroke recognition alone. Existing scales, however,  
19 either include items requiring complex assessment (such as extinction<sup>11, 15</sup>) or exclude  
20 items highly relevant for evaluation of stroke progression (such as level of  
21 consciousness, arm or leg motor function<sup>3, 7, 11</sup>).

22  
23  
24  
25  
26  
27  
28  
29  
30 Sensitivity of the sNIHSS-EMS regarding stroke recognition (91%) was superior to  
31 previously published results for the simpler CPSS (85%) and FAST (87%) evaluated in  
32 the same cohort of patients.<sup>2</sup> In contrast, specificity (52%) was lower compared to the  
33 CPSS (65%) and FAST (64%).<sup>2</sup> As the overall burden of a missed stroke outweighs the  
34 potentially increased workload of emergency departments, higher sensitivity may be  
35 considered more relevant. Simpler stroke scales may provide a slightly faster initial  
36 assessment, but subsequently require the use of at least one additional scale to  
37 determine stroke severity or predict LVO. The use of multiple scales, however, may be  
38 error-prone and complicates communication with receiving hospitals.

39  
40  
41  
42  
43  
44  
45  
46  
47  
48  
49 According to recent European and American recommendations, clinical screening tools  
50 may be considered in order to facilitate direct transport of patients with suspected LVO  
51 to Comprehensive Stroke Centers (CSC) with endovascular facility.<sup>20, 24</sup> For LVO  
52 prediction, our analysis revealed a maximum Youden index for the cut-point of  $\geq 6$  for  
53 the sNIHSS-EMS and, in accordance with previous findings, 9 for the original  
54  
55  
56  
57  
58  
59  
60

1 NIHSS.<sup>25</sup> Importantly, to adjust for hospital capacities and local stroke network  
2 requirements, this threshold can be adapted: higher cut-points result in an increased  
3 specificity (Table 2) leading to reduced numbers of patients bypassing Acute Stroke  
4 Ready Hospitals (ASRH) or Primary Stroke Centers (PSC) without endovascular  
5 facility.  
6  
7  
8  
9  
10

11 The NIHSS items 'visual', 'gaze' and 'extinction' are part of some dedicated LVO  
12 prediction scales,<sup>10, 11, 14, 15</sup> but were not included in the sNIHSS-EMS due to  
13 unfavorable ratings regarding prehospital assessability. Re-inclusion of each separate  
14 item did not result in the presumed higher predictive value for LVO detection. Only  
15 combined re-inclusion of all three rejected items led to marginally enhanced test  
16 characteristics, but would result in a significantly increased number of complex-to-  
17 assess items and thus an inconvenient scale.  
18  
19  
20  
21  
22  
23  
24  
25  
26

27 For comparison with existing scales, we externally validated dedicated LVO prediction  
28 scales in our cohort by using the cut-points as provided in the original publications and  
29 found the sNIHSS-EMS to offer comparable sensitivity and specificity (Table 4). Better  
30 test characteristics reported in the original publications for some scales may be due to  
31 differences in the definition of LVO (e.g. the 3I-SS focused on carotid T and M1  
32 occlusions only,<sup>10</sup> while the LAMS also included M3/4 occlusions<sup>16</sup>). The sNIHSS-8,  
33 which had a higher AUC in the ROC analysis than the sNIHSS-EMS, was not  
34 developed for LVO prediction and includes items rejected by EMS personnel in our  
35 survey due to the complexity of correct assessment.  
36  
37  
38  
39  
40  
41  
42  
43  
44  
45  
46

47 LVO prediction by clinical scales has recently been criticized due to the high false-  
48 negative rate compared to vessel imaging.<sup>17, 26</sup> The sNIHSS-EMS is not intended to  
49 substitute in-hospital acute vessel imaging,<sup>17</sup> and prehospital acute vessel imaging is  
50 still an exception.<sup>27</sup> Currently, mainly due to the narrow time window for effective  
51 intravenous thrombolysis, patients are transferred to the closest stroke center regardless  
52 of LVO suspicion. In the era of interventional thrombectomy however, ASRH or PSC  
53  
54  
55  
56  
57  
58  
59  
60

1 may have to be bypassed in favor of CSC with endovascular facility in sensibly selected  
2 cases.  
3

4  
5 Based on clinical criteria alone, the sNIHSS-EMS identifies the majority of patients  
6 with acute LVO, i.e. those patients who might benefit from a direct transfer to CSC with  
7 endovascular facility. In addition, the minority of LVO patients not bypassed to  
8 endovascular ready CSC (i.e. total score < 6 despite LVO) are not lost to endovascular  
9 therapy since secondary transportation to an endovascular ready CSC is still possible.  
10

11 The sNIHSS-EMS is designed to permit the monitoring of stroke progression from pre-  
12 to in-hospital care on the item-level, a feature that has been neglected in other scales.  
13

14 Clinical implications include the earlier recognition of symptom fluctuation with  
15 consequences e.g. for blood pressure management or selection of imaging modality. In  
16 practice, if a '2' is scored for 'Motor Leg left' on the sNIHSS-EMS, a '4' on the same  
17 item during routine NIHSS evaluation in the ER points to early clinical deterioration.  
18

19 Clinical scores using merged items (e.g. 'hemiparesis'<sup>10</sup> or 'language/dysarthria'<sup>4</sup>) or  
20 modified item scoring (e.g. motor function scoring from 0 to 2 instead of 0 to 4<sup>11, 12, 14-</sup>  
21 16) impede seamless monitoring of symptom progression.  
22

23 Despite the positive aspects of the sNIHSS-EMS, some limitations of the present study  
24 require further discussion. Test characteristics regarding LVO prediction were  
25 calculated in a cohort of patients with confirmed ischemic stroke because determination  
26 of the 'true' LVO prediction threshold is only possible in a cohort without stroke  
27 mimics or hemorrhagic stroke. However, although this approach is in concordance with  
28 methods used in the past in the design of dedicated LVO prediction scales,<sup>12, 14, 16</sup> future  
29 prospective validation in the prehospital target population will be necessary to  
30 determine prevalence-dependent test characteristics. We were not able to assess LVO  
31 prediction of the LAMS because the item 'grip strength' is not part of the NIHSS and  
32 thus, was not routinely documented in our cohort. According to a retrospective  
33 validation study in anterior circulation stroke, the sensitivity of the LAMS for LVO  
34  
35  
36  
37  
38  
39  
40  
41  
42  
43  
44  
45  
46  
47  
48  
49  
50  
51  
52  
53  
54  
55  
56  
57  
58  
59  
60

1 prediction was reported as 81% (at a threshold of 4).<sup>16</sup> As patients with stroke mimics  
2  
3 (and thus no LVO) exhibit low NIHSS scores, inclusion of these cases into the analyses,  
4  
5 would lead to an increased specificity of our cut-points. The sNIHSS-EMS is not able to  
6  
7 differentiate between ischemic and hemorrhagic stroke. This might not be a  
8  
9 disadvantage as severely affected hemorrhagic stroke patients benefit from direct  
10  
11 admission to a CSC with neurological intensive care capacity.<sup>28</sup> Despite involvement of  
12  
13 EMS systems from three European countries, generalizability to further EMS systems  
14  
15 around the world cannot be concluded. The low response-rate of our online survey  
16  
17 makes a non-response bias likely. Due to the participants' high professional experience,  
18  
19 one might have expected a shift of the suitability assessment towards more complex  
20  
21 items. However, this was not observed. As a strength of this study, LVO was evaluated  
22  
23 by CTA or MRA, and not with less accurate duplex sonography as done in previous  
24  
25 studies evaluating LVO prediction scales.<sup>11, 16</sup> The sNIHSS-EMS was primarily  
26  
27 designed to fulfill requirements for prehospital use. Although kept simple, additional  
28  
29 training on the new scale is recommended. Moreover, the sNIHSS-EMS may also serve  
30  
31 in telemedicine with usually non-neurologic physicians performing the initial patient  
32  
33 examination.  
34  
35  
36  
37  
38  
39  
40

## 41 **CONCLUSION**

42  
43 The sNIHSS-EMS may overcome the need for sequential use of multiple emergency  
44  
45 stroke scales by enabling parallel stroke recognition, severity grading, and LVO  
46  
47 prediction. Full NIHSS-item-compatibility permits evaluation of stroke progression  
48  
49 starting from the prehospital phase. Offering comparable test characteristics as  
50  
51 dedicated scales, the sNIHSS-EMS may be a promising tool for rapid and  
52  
53 comprehensive prehospital stroke assessment and triage.  
54  
55  
56  
57  
58  
59  
60

## Acknowledgments

We thank all survey participants for their contribution. Those who gave consent to the publication of their names are listed in the Appendix. We thank Louise Alice Härtig for language revision of the manuscript. We acknowledge support by Deutsche Forschungsgemeinschaft and Open Access Publishing Fund of University of Tübingen.

## Ethical approval

Ethical approvals were obtained from the ethics committee of the Medical Faculty Heidelberg and the ethics committee at the University Hospital Tuebingen, Germany (protocol-numbers S-109/2013 and 648/2015BO2, respectively). Written informed consent was waived.

## Funding

This study was investigator initiated, without funding.

## Contributorship

SP and JCP conceived and designed the study. EP provided the EMS data. HR and SP created and validated the LVO prediction database. SP, JCP, AE and CH collected and analyzed the data. JH and JA developed and maintained the online survey. JCP, FH, SP drafted the article. JCP, HR, FH, CH, PAR, SN, SP revised the manuscript.

## Guarantor

SP and JCP take the responsibility for the paper as a whole.

## Declaration of Conflicting Interests

Personal fees, travel support, speaker honoraria, or research grants were received from Bayer Healthcare (FH, HR, PR, SN, SP), BeneChill (SP), BMS Pfizer (PR, SP),

1 Boehringer-Ingelheim (JCP, PR, SN, SP), Brainomix Ltd. (SN), Covidien (SP), C.R.  
2  
3 Bard (SP), EMCOOLS (SP), Helena Laboratories (FH, SP), HVM Medical (SP),  
4  
5 Medtronic (SN), Pfizer (JCP, SN), Raumedic (SP), ZOLL (SP), The other authors  
6  
7 report no conflicts of interest.  
8  
9

10  
11 **Provenance and peer review:** Not commissioned; externally peer reviewed.  
12

13  
14 **Data sharing statement:** No additional data are available.  
15  
16  
17  
18  
19  
20  
21  
22  
23  
24  
25  
26  
27  
28  
29  
30  
31  
32  
33  
34  
35  
36  
37  
38  
39  
40  
41  
42  
43  
44  
45  
46  
47  
48  
49  
50  
51  
52  
53  
54  
55  
56  
57  
58  
59  
60

## References

1. Brandler ES, Sharma M, Sinert RH, *et al.* Prehospital stroke scales in urban environments: a systematic review. *Neurology* 2014;82:2241-9.
2. Purruicker JC, Hametner C, Engelbrecht A, *et al.* Comparison of stroke recognition and stroke severity scores for stroke detection in a single cohort. *J Neurol Neurosurg Psychiatry* 2015;86:1021-8.
3. Tirschwell DL, Longstreth WT, Jr., Becker KJ, *et al.* Shortening the NIH Stroke scale for use in the prehospital setting. *Stroke* 2002;33:2801-6.
4. Iguchi Y, Kimura K, Watanabe M, *et al.* Utility of the Kurashiki Prehospital Stroke Scale for hyperacute stroke. *Cerebrovasc Dis* 2011;31:51-6.
5. Hasegawa Y, Sasaki N, Yamada K, *et al.* Prediction of thrombolytic therapy after stroke-bypass transportation: the Maria Prehospital Stroke Scale score. *J Stroke Cerebrovasc Dis* 2013;22:514-9.
6. Kimura K, Inoue T, Iguchi Y, *et al.* Kurashiki prehospital stroke scale. *Cerebrovasc Dis* 2008;25:189-91.
7. Llanes JN, Kidwell CS, Starkman S, *et al.* The Los Angeles Motor Scale (LAMS): a new measure to characterize stroke severity in the field. *Prehosp Emerg Care* 2004;8:46-50.
8. Meyer BC, Hemmen TM, Jackson CM, *et al.* Modified National Institutes of Health Stroke Scale for use in stroke clinical trials: prospective reliability and validity. *Stroke* 2002;33:1261-6.
9. Whelley-Wilson CM, Newman GC. A stroke scale for emergency triage. *J Stroke Cerebrovasc Dis* 2004;13:247-53.

- 1  
2  
3  
4  
5  
6  
7  
8  
9  
10  
11  
12  
13  
14  
15  
16  
17  
18  
19  
20  
21  
22  
23  
24  
25  
26  
27  
28  
29  
30  
31  
32  
33  
34  
35  
36  
37  
38  
39  
40  
41  
42  
43  
44  
45  
46  
47  
48  
49  
50  
51  
52  
53  
54  
55  
56  
57  
58  
59  
60
10. Singer OC, Dvorak F, du Mesnil de Rochemont R, *et al.* A simple 3-item stroke scale: comparison with the National Institutes of Health Stroke Scale and prediction of middle cerebral artery occlusion. *Stroke* 2005;36:773-6.
  11. Perez de la Ossa N, Carrera D, Gorchs M, *et al.* Design and validation of a prehospital stroke scale to predict large arterial occlusion: the rapid arterial occlusion evaluation scale. *Stroke* 2014;45:87-91.
  12. Katz BS, McMullan JT, Sucharew H, *et al.* Design and validation of a prehospital scale to predict stroke severity: Cincinnati Prehospital Stroke Severity Scale. *Stroke* 2015;46:1508-12.
  13. Teleb MS, Ver Hage A, Carter J, *et al.* Stroke vision, aphasia, neglect (VAN) assessment-a novel emergent large vessel occlusion screening tool: pilot study and comparison with current clinical severity indices. *J Neurointerv Surg* 2017;9:122-6.
  14. Hastrup S, Damgaard D, Johnsen SP, *et al.* Prehospital Acute Stroke Severity Scale to Predict Large Artery Occlusion: Design and Comparison With Other Scales. *Stroke* 2016;47:1772-6.
  15. Lima FO, Silva GS, Furie KL, *et al.* Field Assessment Stroke Triage for Emergency Destination: A Simple and Accurate Prehospital Scale to Detect Large Vessel Occlusion Strokes. *Stroke* 2016;47:1997-2002.
  16. Nazliel B, Starkman S, Liebeskind DS, *et al.* A brief prehospital stroke severity scale identifies ischemic stroke patients harboring persisting large arterial occlusions. *Stroke* 2008;39:2264-7.
  17. Heldner MR, Hsieh K, Broeg-Morvay A, *et al.* Clinical prediction of large vessel occlusion in anterior circulation stroke: mission impossible? *J Neurol* 2016;263:1633-40.
  18. Vanacker P, Heldner MR, Amiguet M, *et al.* Prediction of Large Vessel Occlusions in Acute Stroke: National Institute of Health Stroke Scale Is Hard to Beat. *Crit Care Med* 2016;44:e336-43.



- 1  
2  
3  
4  
5  
6  
7  
8  
9  
10  
11  
12  
13  
14  
15  
16  
17  
18  
19  
20  
21  
22  
23  
24  
25  
26  
27  
28  
29  
30  
31  
32  
33  
34  
35  
36  
37  
38  
39  
40  
41  
42  
43  
44  
45  
46  
47  
48  
49  
50  
51  
52  
53  
54  
55  
56  
57  
58  
59  
60
19. Rinaldo L, Brinjikji W, McCutcheon BA, *et al.* Hospital transfer associated with increased mortality after endovascular revascularization for acute ischemic stroke. *J Neurointerv Surg* 2016.
20. Pride GL, Fraser JF, Gupta R, *et al.* Prehospital care delivery and triage of stroke with emergent large vessel occlusion (ELVO): report of the Standards and Guidelines Committee of the Society of Neurointerventional Surgery. *J Neurointerv Surg* 2016.
21. DeLong ER, DeLong DM, Clarke-Pearson DL. Comparing the areas under two or more correlated receiver operating characteristic curves: a nonparametric approach. *Biometrics* 1988;44:837-45.
22. Nor AM, Davis J, Sen B, *et al.* The Recognition of Stroke in the Emergency Room (ROSIER) scale: development and validation of a stroke recognition instrument. *Lancet Neurol* 2005;4:727-34.
23. Majerus S, Bruno MA, Schnakers C, *et al.* The problem of aphasia in the assessment of consciousness in brain-damaged patients. *Prog Brain Res* 2009;177:49-61.
24. Fiehler J, Cognard C, Gallitelli M, *et al.* European Recommendations on Organisation of Interventional Care in Acute Stroke (EROICAS). *Int J Stroke* 2016;11:701-16.
25. Heldner MR, Zubler C, Mattle HP, *et al.* National Institutes of Health stroke scale score and vessel occlusion in 2152 patients with acute ischemic stroke. *Stroke* 2013;44:1153-7.
26. Turc G, Maier B, Naggara O, *et al.* Clinical Scales Do Not Reliably Identify Acute Ischemic Stroke Patients With Large-Artery Occlusion. *Stroke* 2016;47:1466-72.
27. John S, Stock S, Masaryk T, *et al.* Performance of CT Angiography on a Mobile Stroke Treatment Unit: Implications for Triage. *J Neuroimaging* 2016;26:391-4.

1  
2  
3  
4  
5  
6  
7  
8  
9  
10  
11  
12  
13  
14  
15  
16  
17  
18  
19  
20  
21  
22  
23  
24  
25  
26  
27  
28  
29  
30  
31  
32  
33  
34  
35  
36  
37  
38  
39  
40  
41  
42  
43  
44  
45  
46  
47  
48  
49  
50  
51  
52  
53  
54  
55  
56  
57  
58  
59  
60

28. Diringer MN, Edwards DF. Admission to a neurologic/neurosurgical intensive care unit is associated with reduced mortality rate after intracerebral hemorrhage. *Crit Care Med* 2001;29:635-40.

For peer review only

**Table 1** The shortened NIH Stroke Scale for Emergency Medical Services (sNIHSS-EMS).

| No.        | sNIHSS-EMS item        | Equivalent to the<br>NIHSS-item | Range      |
|------------|------------------------|---------------------------------|------------|
| 1          | Level of Consciousness | 1a                              | 0 – 3      |
| 2          | Facial Palsy           | 4                               | 0 – 3      |
| 3a         | Motor Arm (left)       | 5                               | 0 – 4 / UN |
| 3b         | Motor Arm (right)      | 5                               | 0 – 4 / UN |
| 4a         | Motor Leg (left)       | 6                               | 0 – 4 / UN |
| 4b         | Motor Leg (right)      | 6                               | 0 – 4 / UN |
| 5          | Sensory                | 8                               | 0 – 2      |
| 6          | Best Language          | 9                               | 0 – 3      |
| 7          | Dysarthria             | 10                              | 0 – 2 / UN |
| <b>Sum</b> |                        | –                               | 0 – 29     |

Range indicates possible scores;

Abbreviations: UN = untestable (motor items: amputation or joint fusion, dysarthria: intubation or other physical barrier).

**Table 2**

Cut-off points for prediction of acute large vessel occlusion.

| Cut-off Point | Sensitivity        | Specificity        | Positive Predictive Value | Negative Predictive Value | Accuracy | <i>J</i> |
|---------------|--------------------|--------------------|---------------------------|---------------------------|----------|----------|
| sNIHSS-       |                    |                    |                           |                           |          |          |
| EMS           |                    |                    |                           |                           |          |          |
| 5             | 74.8 (69.4 – 79.7) | 73.4 (69.1 – 77.4) | 66.4 (59.0 – 69.5)        | 81.9 (77.8 – 85.6)        | 74.0     | 0.482    |
| 6*            | 70.3 (64.7 – 75.5) | 80.7 (76.8 – 84.3) | 70.1 (64.5 – 75.3)        | 80.9 (76.9 – 84.4)        | 76.7     | 0.511    |
| 7             | 65.2 (59.4 – 70.6) | 85.8 (82.2 – 88.9) | 74.7 (68.9 – 79.9)        | 79.3 (75.4 – 82.8)        | 77.7     | 0.510    |
| NIHSS         |                    |                    |                           |                           |          |          |
| 8             | 72.4 (66.9 – 77.5) | 80.7 (76.8 – 84.3) | 70.7 (65.2 – 75.8)        | 82.0 (78.1 – 85.4)        | 77.5     | 0.531    |
| 9*            | 69.3 (63.7 – 74.6) | 85.4 (81.8 – 88.5) | 75.3 (69.7 – 80.3)        | 81.2 (77.4 – 84.6)        | 79.1     | 0.547    |
| 10            | 65.9 (60.1 – 71.3) | 88.0 (84.7 – 90.9) | 78.0 (72.2 – 83.0)        | 80.0 (76.2 – 83.5)        | 79.4     | 0.539    |

Abbreviations: NIHSS = NIH Stroke Scale; sNIHSS-EMS, shortened NIHSS for emergency medical services.

Data are % (95% CI). *J* indicates Youden's-Index, \* indicates the optimal cut-off according to the Youden index.

**Table 3** Comparison of clinical scales for prehospital prediction of large vessel occlusions

|                                                                     | sNIHS<br>S-8 | sNIHS<br>S-5 | 3I-SS    | LAM<br>S  | RAC<br>E                | CPSS<br>S | FAS<br>T-ED | PASS                     | sNIHS<br>S-EMS |
|---------------------------------------------------------------------|--------------|--------------|----------|-----------|-------------------------|-----------|-------------|--------------------------|----------------|
| Reference                                                           | 3            | 3            | 10       | 16        | 11                      | 12        | 15          | 14                       | 10             |
| Scale characteristics                                               |              |              |          |           |                         |           |             |                          |                |
| No. of items assessed*                                              | 7            | 4            | 3        | 3         | 5 <sup>†</sup>          | 3         | 5           | 3                        | 7              |
| Score range                                                         | 0–24         | 0–16         | 0–6      | 0–5       | 0–9                     | 0–4       | 0–9         | 0–3                      | 0–29           |
| NIHSS compatible item assessment                                    | ●            | ●            | –        | –         | –                       | –         | –           | –                        | ●              |
| Stroke Recognition                                                  | ●            | ●            | –        | –         | –                       | –         | –           | –                        | ●              |
| Stroke severity grading                                             | ●            | ●            | –        | (●)       | (●)                     | –         | –           | –                        | ●              |
| Large vessel occlusion prediction                                   | ●            | ●            | ●        | ●         | ●                       | ●         | ●           | ●                        | ●              |
| LVO prediction, test characteristics, own cohort (N = 741, 44% LVO) |              |              |          |           |                         |           |             |                          |                |
| Cut-point used <sup>‡</sup>                                         | ≥ 6          | ≥ 3          | ≥ 4      | ≥ 4       | ≥ 5                     | ≥ 2       | ≥ 4         | ≥ 2                      | ≥ 6            |
| Sensitivity                                                         | 64%          | 69%          | 40%      | –§        | 59%                     | 59%       | 60%         | 68%                      | 70%            |
| Specificity                                                         | 88%          | 81%          | 95%      | –§        | 91%                     | 89%       | 90%         | 84%                      | 81%            |
| PPV                                                                 | 78%          | 70%          | 85%      | –§        | 81%                     | 77%       | 80%         | 74%                      | 70%            |
| NPV                                                                 | 79%          | 80%          | 71%      | –§        | 78%                     | 77%       | 78%         | 81%                      | 81%            |
| LVO prediction, test characteristics, original cohorts**            |              |              |          |           |                         |           |             |                          |                |
| Cohort (N (%LVO))                                                   | –            | –            | 83 (35%) | 119 (62%) | 357 (21%) <sup>††</sup> | 303 (73%) | 727 (33%)   | 3127 (35%) <sup>‡‡</sup> | –              |
| Sensitivity                                                         | –            | –            | 67%      | 81%       | 85%                     | 83%       | 61%         | 66%                      | –              |

|   |             |   |   |     |     |     |     |     |     |   |
|---|-------------|---|---|-----|-----|-----|-----|-----|-----|---|
| 1 | Specificity | – | – | 92% | 89% | 68% | 40% | 89% | 83% | – |
| 2 |             |   |   |     |     |     |     |     |     |   |
| 3 | PPV         | – | – | 74% | nd  | 42% | nd  | 72% | 68% | – |
| 4 |             |   |   |     |     |     |     |     |     |   |
| 5 | NPV         | – | – | 89% | nd  | 94% | nd  | 82% | 81% | – |
| 6 |             |   |   |     |     |     |     |     |     |   |

Abbreviations: nd: no data.

\* Motor arm (or leg) scored for each side (left or right) is counted as one item

† If right sided hemiparesis, aphasia is assessed, if left sided hemiparesis, agnosia.

‡ Cut-points according to original publications, with exception of the sNIHSS-8 and -5.

Based on the Youden indices calculated from our data, optimal cut-points are different:

3I-SS  $\geq$  2, RACE  $\geq$  3, CPSSS  $\geq$  1, FAST-ED  $\geq$  3.

§ Grip-strength was not routinely documented, therefore external validation of the LAMS was not possible.

\*\* Definition of large vessel occlusions according to original publications (3I-SS: carotid-T or M1; LAMS: ICA, M1, M2, M3/4, ACA; RACE: terminal ICA, M1, tandem CCA/ICA+M1, BA; CPSSS: ICA, M1, tandem ICA+M2, BA; FAST-ED: ICA, M1, M2, BA; PASS: “visible clot in the anterior or posterior circulation on CTA or MRA”; abbreviations within the main text).

†† Including cases assessed by transcranial duplex only (N = 197).

‡‡ Only patients who received intravenous tPA; 2/3 of entire cohort were taken as a random sample for derivation. In the remaining 1/3, sensitivity was 61%, specificity 83%.

1  
2  
3  
4  
5 **Figure 1.** Receiver operating curves for prediction of acute large vessel occlusion.  
6

7  
8 Abbreviations: AUC: area under the curve; ref.: reference.  
9  
10  
11  
12  
13  
14  
15  
16  
17  
18  
19  
20  
21  
22  
23  
24  
25  
26  
27  
28  
29  
30  
31  
32  
33  
34  
35  
36  
37  
38  
39  
40  
41  
42  
43  
44  
45  
46  
47  
48  
49  
50  
51  
52  
53  
54  
55  
56  
57  
58  
59  
60

1  
2  
3  
4  
5  
6  
7  
8  
9  
10  
11  
12  
13  
14  
15  
16  
17  
18  
19  
20  
21  
22  
23  
24  
25  
26  
27  
28  
29  
30  
31  
32  
33  
34  
35  
36  
37  
38  
39  
40  
41  
42  
43  
44  
45  
46  
47  
48  
49  
50  
51  
52  
53  
54  
55  
56  
57  
58  
59  
60



| Scale      | Area Under the Curve (95% CI) | <i>p</i>    |
|------------|-------------------------------|-------------|
| sNIHSS-EMS | 0.808 (0.775 – 0.841)         | <i>ref.</i> |
| NIHSS      | 0.821 (0.788 – 0.854)         | 0.019       |
| 3I-SS      | 0.804 (0.770 – 0.838)         | 0.697       |
| RACE       | 0.816 (0.784 – 0.849)         | 0.314       |
| CPSSS      | 0.802 (0.767 – 0.836)         | 0.605       |
| FAST-ED    | 0.825 (0.793 – 0.857)         | 0.078       |
| PASS       | 0.805 (0.771 – 0.838)         | 0.766       |
| sNIHSS-8   | 0.823 (0.791 – 0.855)         | 0.020       |
| sNIHSS-5   | 0.803 (0.769 – 0.837)         | 0.643       |

Figure 1

124x173mm (300 x 300 DPI)



| Section & Topic          | No  | Item                                                                                                                                                   | Reported on page #              |
|--------------------------|-----|--------------------------------------------------------------------------------------------------------------------------------------------------------|---------------------------------|
| <b>TITLE OR ABSTRACT</b> |     |                                                                                                                                                        |                                 |
|                          | 1   | Identification as a study of diagnostic accuracy using at least one measure of accuracy (such as sensitivity, specificity, predictive values, or AUC)  | 2                               |
| <b>ABSTRACT</b>          |     |                                                                                                                                                        |                                 |
|                          | 2   | Structured summary of study design, methods, results, and conclusions (for specific guidance, see STARD for Abstracts)                                 | 2                               |
| <b>INTRODUCTION</b>      |     |                                                                                                                                                        |                                 |
|                          | 3   | Scientific and clinical background, including the intended use and clinical role of the index test                                                     | 4                               |
|                          | 4   | Study objectives and hypotheses                                                                                                                        | 4                               |
| <b>METHODS</b>           |     |                                                                                                                                                        |                                 |
| <i>Study design</i>      | 5   | Whether data collection was planned before the index test and reference standard were performed (prospective study) or after (retrospective study)     | 4                               |
| <i>Participants</i>      | 6   | Eligibility criteria                                                                                                                                   | 4/5                             |
|                          | 7   | On what basis potentially eligible participants were identified (such as symptoms, results from previous tests, inclusion in registry)                 | 5/6                             |
|                          | 8   | Where and when potentially eligible participants were identified (setting, location and dates)                                                         | 5/6                             |
|                          | 9   | Whether participants formed a consecutive, random or convenience series                                                                                | 5/6                             |
| <i>Test methods</i>      | 10a | Index test, in sufficient detail to allow replication                                                                                                  | 4-7                             |
|                          | 10b | Reference standard, in sufficient detail to allow replication                                                                                          | 5/6                             |
|                          | 11  | Rationale for choosing the reference standard (if alternatives exist)                                                                                  | 5/6, 7                          |
|                          | 12a | Definition of and rationale for test positivity cut-offs or result categories of the index test, distinguishing pre-specified from exploratory         | 6/7                             |
|                          | 12b | Definition of and rationale for test positivity cut-offs or result categories of the reference standard, distinguishing pre-specified from exploratory | 6/7                             |
|                          | 13a | Whether clinical information and reference standard results were available to the performers/readers of the index test                                 | 6/7                             |
|                          | 13b | Whether clinical information and index test results were available to the assessors of the reference standard                                          | 6/7                             |
| <i>Analysis</i>          | 14  | Methods for estimating or comparing measures of diagnostic accuracy                                                                                    | 6/7                             |
|                          | 15  | How indeterminate index test or reference standard results were handled                                                                                | NA                              |
|                          | 16  | How missing data on the index test and reference standard were handled                                                                                 | NA                              |
|                          | 17  | Any analyses of variability in diagnostic accuracy, distinguishing pre-specified from exploratory                                                      | 6/7                             |
|                          | 18  | Intended sample size and how it was determined                                                                                                         | 6, +Appendix                    |
| <b>RESULTS</b>           |     |                                                                                                                                                        |                                 |
| <i>Participants</i>      | 19  | Flow of participants, using a diagram                                                                                                                  | NA                              |
|                          | 20  | Baseline demographic and clinical characteristics of participants                                                                                      | 8, +Appendix.                   |
|                          | 21a | Distribution of severity of disease in those with the target condition                                                                                 | 8                               |
|                          | 21b | Distribution of alternative diagnoses in those without the target condition                                                                            | Appendix, previousl. published. |
|                          | 22  | Time interval and any clinical interventions between index test and reference standard                                                                 | NA                              |
| <i>Test results</i>      | 23  | Cross tabulation of the index test results (or their distribution) by the results of the reference standard                                            | Appendix                        |
|                          | 24  | Estimates of diagnostic accuracy and their precision (such as 95% confidence intervals)                                                                | 8/9                             |
|                          | 25  | Any adverse events from performing the index test or the reference standard                                                                            | NA                              |
| <b>DISCUSSION</b>        |     |                                                                                                                                                        |                                 |
|                          | 26  | Study limitations, including sources of potential bias, statistical uncertainty, and generalisability                                                  | 12                              |
|                          | 27  | Implications for practice, including the intended use and clinical role of the index test                                                              | 3; 11,12,13                     |
| <b>OTHER INFORMATION</b> |     |                                                                                                                                                        |                                 |
|                          | 28  | Registration number and name of registry                                                                                                               | NA (IRB-Prot., 12)              |
|                          | 29  | Where the full study protocol can be accessed                                                                                                          | NA                              |
|                          | 30  | Sources of funding and other support; role of funders                                                                                                  | 14                              |
